# Supplementary material for: Minimum effort, maximum effect: modulating twisted intramolecular charge transfer for ultralong room temperature phosphorescence
Source: Royal Society of Chemistry journal article supplement (doi:10.1039/d6sc02382g), 2026-06-16
Supplement: d6sc02382g1.pdf [file d6sc02382g1.pdf]

## Supporting Information

### **Minimum Effort, Maximum Effect: Modulating Twisted Intramolecular Charge Transfer for Ultralong Room Temperature Phosphorescence**

*Wu-Jie Guo, ‡<sup>a</sup> Shirong Yan, ‡<sup>a</sup> Shihao Xu,<sup>a</sup> Tongfei Qi,<sup>a</sup> and Hui-Qing Peng\*<sup>a</sup>*

<sup>a</sup> State Key Laboratory of Chemical Resource Engineering, Beijing Advanced Innovation Center for Soft Matter Science and Engineering, Beijing University of Chemical Technology, Beijing 100029, China. E-mail: [hqpeng@mail.buct.edu.cn](mailto:hqpeng@mail.buct.edu.cn)

‡ These authors contributed equally to this work.

## **Contents**

**1. Materials and Methods**

**2. Synthesis and Characterization**

**3. Photophysical properties and Theoretical Calculations**

**4. References**

# 1. Materials and Methods

## 1.1 Materials and Instruments

All reagents were purchased from commercial suppliers and used without further purification. The guest molecules (**SBLs**), 9-julolidinecarboxaldehyde (**QL-CHO**), 4-(azetidin-1-yl)benzaldehyde (**Aze-CHO**), 4-(1-pyrrolidino)benzaldehyde (**Pyr-CHO**), 4-piperidin-1-ylbenzaldehyde (**Pip-CHO**), 4-dimethylaminobenzaldehyde (**N-CHO**), 1-(4-(dimethylamino)phenyl)ethenone (**N-CO**), 4-dimethylaminobenzoic acid (**N-COOH**), and methyl 4-dimethylaminobenzoate (**N-COOMe**) were purchased from commercial suppliers and used after recrystallization with dichloromethane/ *n*-hexane.

<sup>1</sup>H NMR and <sup>13</sup>C NMR spectra were measured on a Bruker Advance III (400 MHz) instrument using chloroform-*d* (CDCl<sub>3</sub>) and dimethyl sulfoxide-D<sub>6</sub> (DMSO-*d*<sub>6</sub>) as the solvent and tetramethylsilane as the internal reference. High resolution mass spectrometry experiments were obtained on Agilent G6540 Q-TOF Mass Spectrometer. UV-vis absorption spectra were measured by a SHIMADZU UV-2600i spectrophotometer. The photoluminescence spectra were measured by a SHIMADZU RF-6000 spectra fluorophotometer, Horiba Fluoremax+ spectrofluorometer and FLS1000 Edinburgh spectrometer. Luminescence decays were measured by time-correlated single photon counting technique using a FLS980 Edinburgh spectrometer and FLS1000 Edinburgh spectrometer with a microsecond flash lamp ( $\mu$ F 900) and pulsed laser. The absolute photoluminescence quantum yields of all doped films were measured on FLS1000 Edinburgh spectrometer with an integrating sphere under ambient conditions. The phosphorescence quantum yields of all doped films were obtained according the reported reference.<sup>1</sup> The excitation wavelengths for photoluminescence spectra and phosphorescence decays were set to 350 nm for **QL-CHO@PVA**, 280 nm for **N-CONMe@PVA** and **N-COOH@PVA**, 260 nm for **N-COOMe@PVA**, and 310 nm for all other samples. EPR analysis was performed on a Bruker E500 Electron Paramagnetic Resonance spectroscopy. The powder X-ray diffraction patterns of doped PVA films were measured by Bruker D2 PHASER Benchtop X-ray diffractometer. Single crystal X-ray diffraction data were collected on a Gemini E X-ray diffraction (Agilent, Oxford) with graphite-monochromator Mo-K $\alpha$  ( $\lambda = 0.71073 \text{ \AA}$ ) at 110 K. Photographs were recorded using a commercial cellphone. The **N-CONMe**, **N-COOH**, **N-COOMe**, and **O-CO** doped PVA films were irradiated with a 254 nm UV lamp, while the remaining samples were irradiated with a 365 nm UV lamp.

## 1.2 Preparation of SBL@PVAs Films

The detailed preparation procedure is described using the doped PVA films with a doping concentration of 1 wt% as an example. Firstly, PVA (3.0 g) was added in deionized water (100 mL) and stirred at 90 °C until completely dissolved to obtain PVA aqueous solution (30 mg/mL). Then, 1,4-dioxane solution of SBLs (3.0 mg/mL, 100  $\mu$ L) was added into the PVA aqueous solution (30 mg/mL, 1 mL) and the mixed solution were ultrasonicated at 60 °C for 0.5 hour for dissolution. Finally, the aqueous solution was drop-coated on quartz glass and the water was removed at 60 °C to obtain to obtain doped PVA films (SBL@PVAs).

## 1.3 Theoretical Calculations

The density functional theory (DFT) and time-dependent DFT (TD-DFT) calculations were performed using Gaussian 09, supported by High performance computing platform of BUCT. To justify the choice of functional, representative hybrid functionals with different Hartree-Fock (HF) exact exchange contributions, including B3LYP, PBE0, M06-2X, and CAM-B3LYP, were benchmarked using N-CHO as a representative molecule. Among these functionals, PBE0/Def2-TZVP gave the best agreement with the experimental data (Table S6). Therefore, PBE0/Def2-TZVP was used for the theoretical calculations of the molecular series.

The relaxed potential energy scan of the lowest singlet excited state ( $S_1$ ) along the dihedral angle  $\varphi$  between the benzene ring and the electron-donating amino group was performed based on the initial optimized molecular structures at ground state ( $S_0$ ) using PBE0 density function theory at the basis set level of Def2-TZVP. The  $S_0$  potential energy along the dihedral angle  $\varphi$  was obtained by extracting the corresponding  $S_0$  energies from the structures generated in the  $S_1$  relaxed potential energy scan along  $\varphi$ . In this scan, the selected dihedral angle  $\varphi$  was fixed at a given value, while all the other geometrical parameters were optimized at the TD-DFT level. Therefore, the obtained planar and twisted geometries were not manually constructed, but were generated from constrained optimizations along the  $S_1$  twisting coordinate. The planar and twisted geometries of N-CHO, N-CO, and N-COOMe used for the excited-state analysis were representative conformations obtained from the relaxed  $S_1$  potential energy scan. The planar geometry corresponds to the nearly coplanar conformation with  $\varphi \approx 0^\circ$ , which was used as the LE/planar ICT-like reference structure. For N-CHO and N-CO,  $\varphi = 120^\circ$  was selected because it represents a twisted conformation near the rotational barrier region along the  $S_1$  twisting coordinate. For

N-COOMe,  $\varphi = 90^\circ$  was selected because the  $S_1$  energy decreases upon twisting and reaches the TICT-favored region around this angle. Specially, these conformations are constrained minima at fixed  $\varphi$  values along the  $S_1$  potential energy scan, rather than necessarily independent unconstrained local minima on the full  $S_1$  potential energy surface. The excited states of the planar and twisted geometries obtained from the potential energy scan were calculated by single-point energy calculations based on PBE0/ Def2-TZVP level.

Solvent-dependent  $S_0$  to  $S_1$  transition dipole moments ( $\mu$ ) were calculated based on PBE0/ Def2-TZVP level with SMD solvation model. Multiwfn package and VMD software<sup>2-4</sup> is implemented to calculate the hole-electron contributions based on Electron excitation analysis. The components of n orbitals are calculated based on Mulliken population analysis (MPA) of Multiwfn package and the reported references.<sup>3, 5, 6</sup> The spin-orbit coupling elements ( $\xi$ ) were calculated by OCRA.<sup>7-9</sup>

## 2. Synthesis and Characterization

### 2.1 Synthesis of N-YT

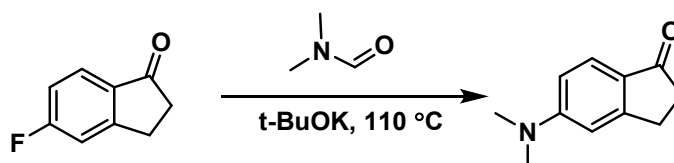

**Scheme S1.** The synthetic route of N-YT.

**Synthesis of N-YT:** 5-Fluoro-1-indanone (10 mmol, 1.50 g), potassium tert-butoxide (15 mmol, 1.67 g) were added to 100 mL two-neck flask. Under protection of Ar, the anhydrous N, N-dimethylformamide (40 mL) were added and the mixture was stirred for another 24 hours at 110 °C under Ar. Then the mixture was extracted with water and dichloromethane. The organic phase was concentrated under vacuum to give the crude product, which was then purified by column chromatography with petroleum ether/ethyl acetate (3:1) to give a yellowish-brown solid (0.12 g, 7%). <sup>1</sup>H NMR (400 MHz, CDCl<sub>3</sub>)  $\delta$  (ppm) = 7.63 (d,  $J = 8.7$  Hz, 1H), 6.69 (dd,  $J_1 = 8.7$  Hz,  $J_2 = 2.3$  Hz, 1H), 6.60 (s, 1H), 3.08 (s, 6H), 3.05-3.00 (m, 2H), 2.66-2.60 (m, 2H). <sup>13</sup>C NMR (101 MHz, CDCl<sub>3</sub>)  $\delta$  (ppm) = 204.99, 158.14, 155.13, 125.72, 125.29, 111.79, 106.94, 40.45, 36.54, 26.02. HR-MS:  $m/z$  [ $M+H^+$ ] calculated for C<sub>11</sub>H<sub>14</sub>NO, 176.1075; found, 176.1136.

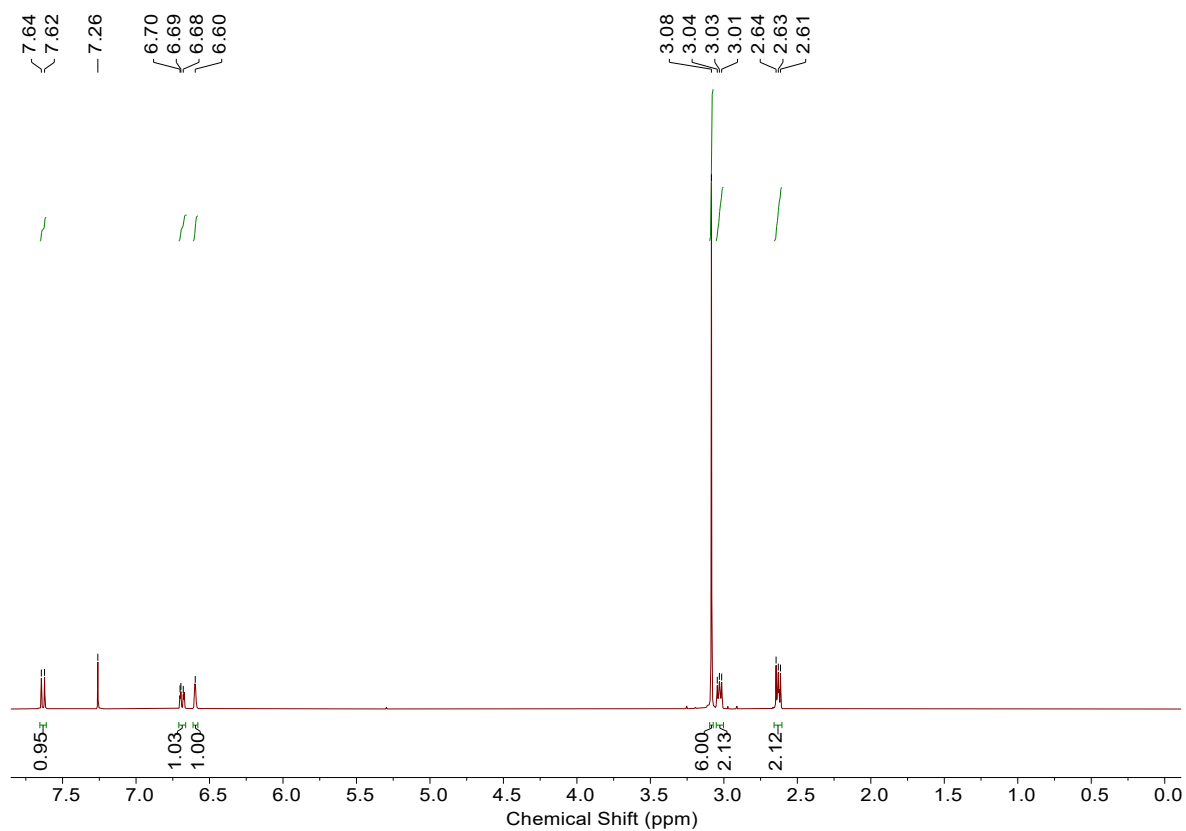

**Fig. S1** The  $^1\text{H}$  NMR spectrum of N-YT in  $\text{CDCl}_3$ .

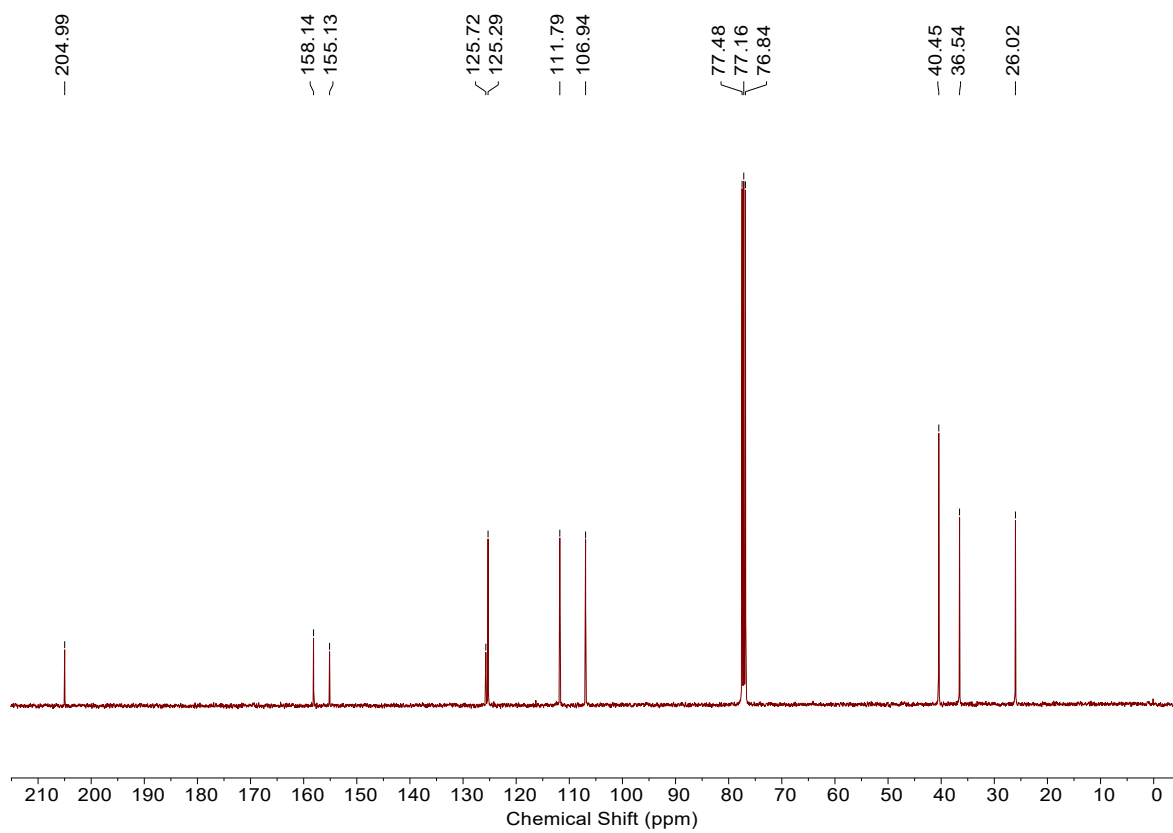

**Fig. S2** The  $^{13}\text{C}$  NMR spectrum of N-YT in  $\text{CDCl}_3$ .

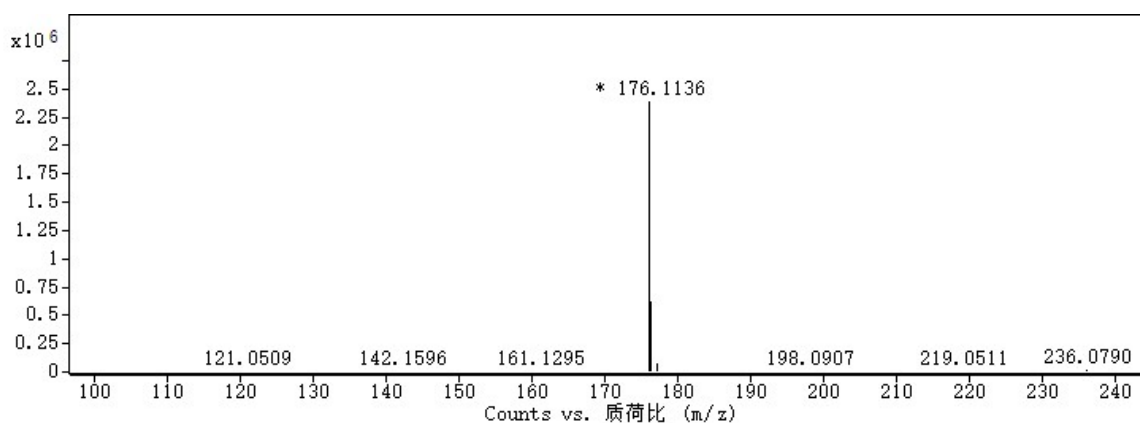

**Fig. S3** The HR-MS of N-YT.

## 2.2 Synthesis of N-CONMe

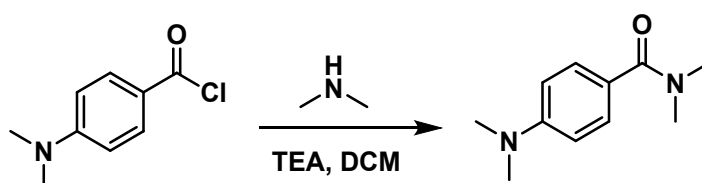

**Scheme S2.** The synthetic route of N-CONMe.

**Synthesis of N-CONMe:** Dimethylamine of 2.0 M in tetrahydrofuran (30 mmol, 15 mL), (*p*-dimethylamino)benzoyl chloride (10 mmol, 1.83 g), triethylamine (15 mmol, 2.1 mL), and anhydrous dichloromethane (20 mL) were added to flask and stirred for 24 hours at room temperature under the protection of Ar. Then the organic phase was concentrated under vacuum to give the crude product, which was then purified by column chromatography with dichloromethane/methanol (20:1) and recrystallization with dichloromethane/*n*-hexane to give a white solid (1.56 g, 81%). <sup>1</sup>H NMR (400 MHz, CDCl<sub>3</sub>) δ (ppm) = 7.38 (d, *J* = 8.8 Hz, 2H), 6.67 (d, *J* = 8.8 Hz, 2H), 3.07 (s, 6H), 2.99 (s, 6H). <sup>13</sup>C NMR (101 MHz, CDCl<sub>3</sub>) δ (ppm) = 172.22, 151.38, 129.30, 123.14, 111.12, 40.27, 36.49; at room temperature, signals at 36.49 ppm were broadened out because of rotation of amide. HR-MS: *m/z* [M+H<sup>+</sup>] calculated for C<sub>11</sub>H<sub>17</sub>N<sub>2</sub>O, 193.1341; found, 193.1380.

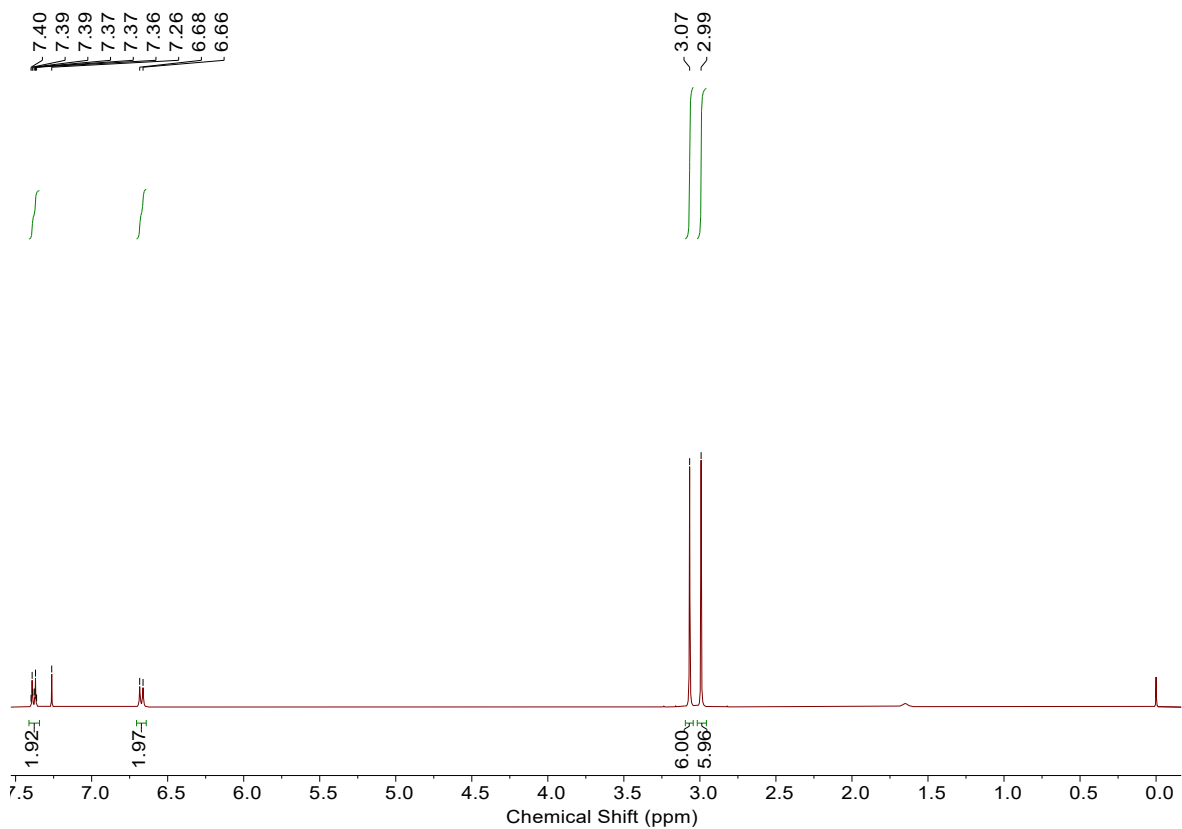

**Fig. S4** The  $^1\text{H}$  NMR spectrum of **N-CONMe** in  $\text{CDCl}_3$ .

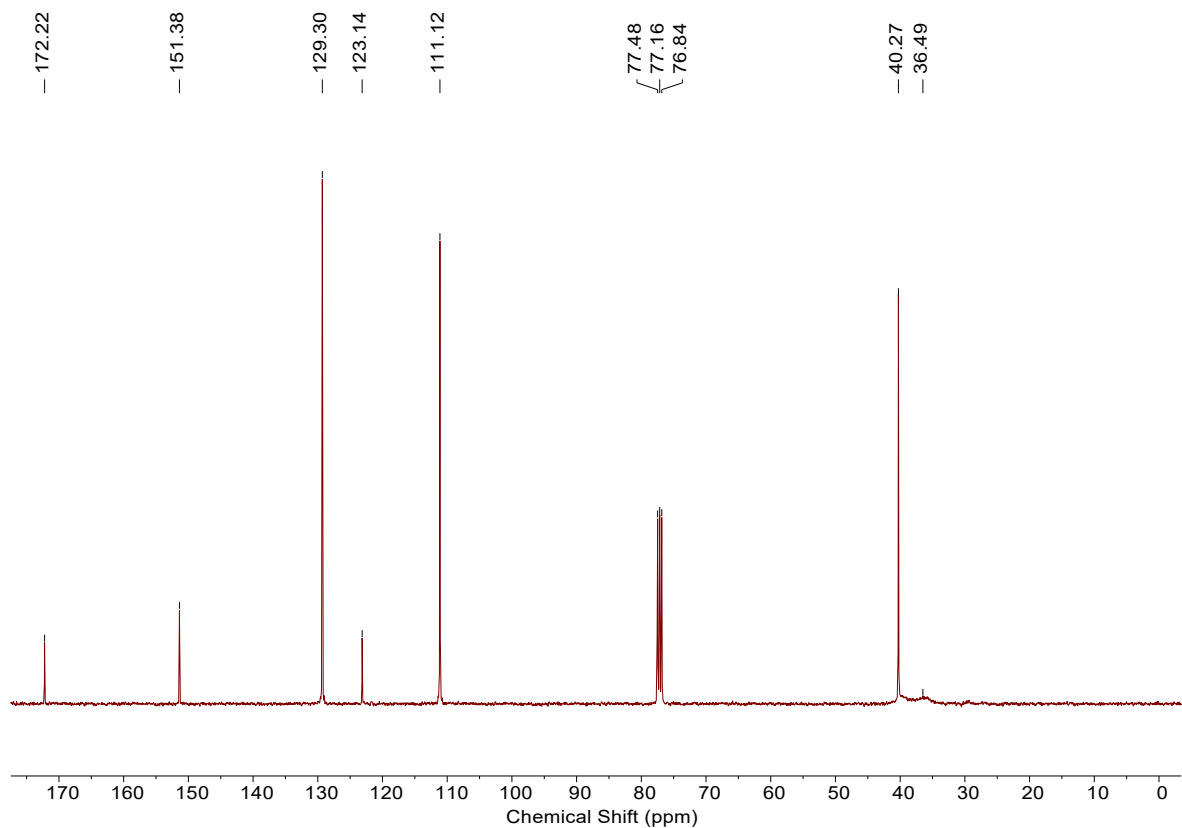

**Fig. S5** The  $^{13}\text{C}$  NMR spectrum of **N-CONMe** in  $\text{CDCl}_3$ .

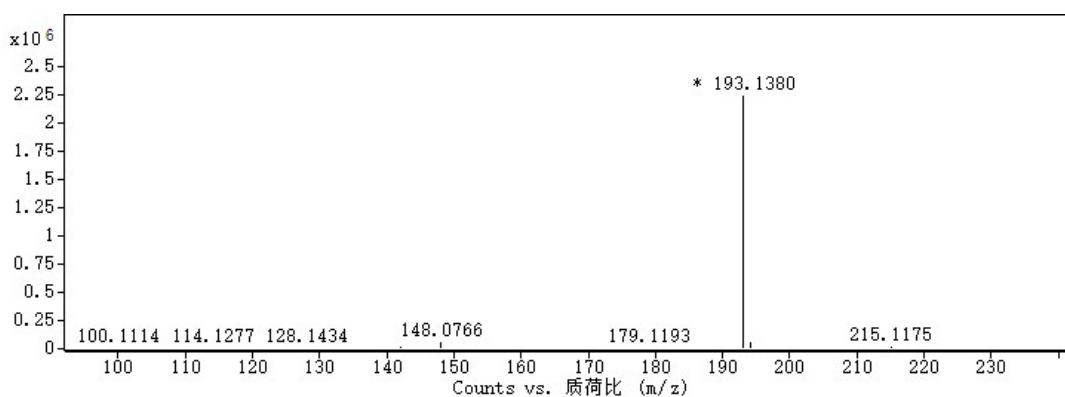

**Fig. S6** The HR-MS of N-CONMe.

### 3. Photophysical properties and Theoretical Calculations

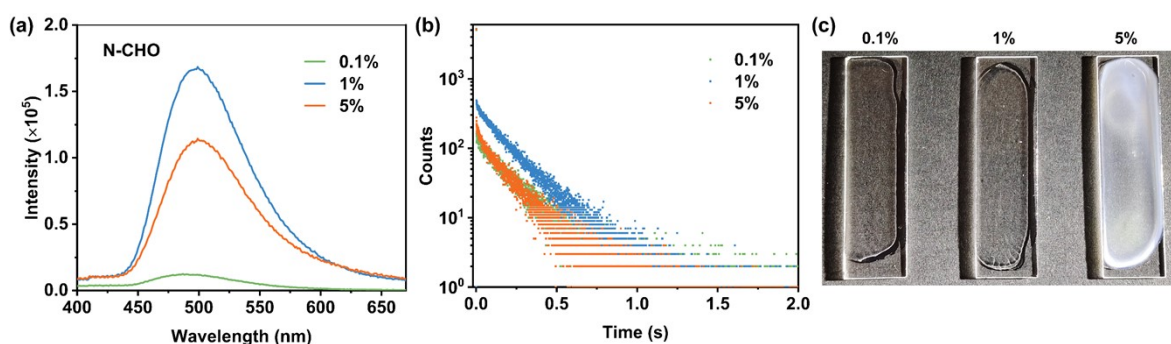

**Fig. S7** (a) The phosphorescence spectra,  $\lambda_{\text{ex}} = 310$  nm, EX slit = 2.5 nm, EM slit = 2.5 nm, delay time = 20 ms, (b) the phosphorescence decay curves monitored at 500 nm,  $\lambda_{\text{ex}} = 310$  nm, and (c) the photographs under daylight of N-CHO doped films with different doping concentration.

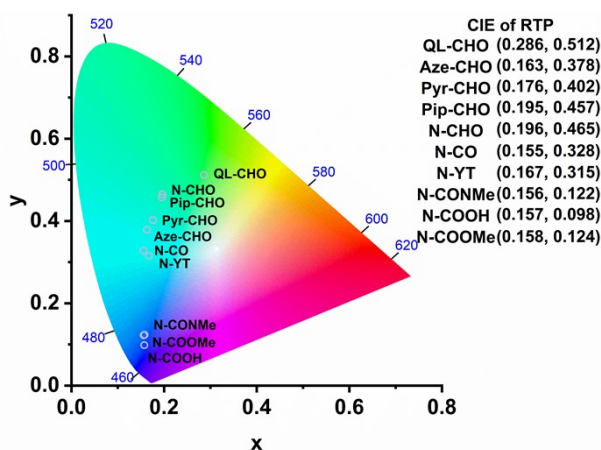

**Fig. S8** Phosphorescence CIE 1931 chromaticity diagram of the SBL@PVAs with the doped concentration of 1 wt% SBL in PVAs

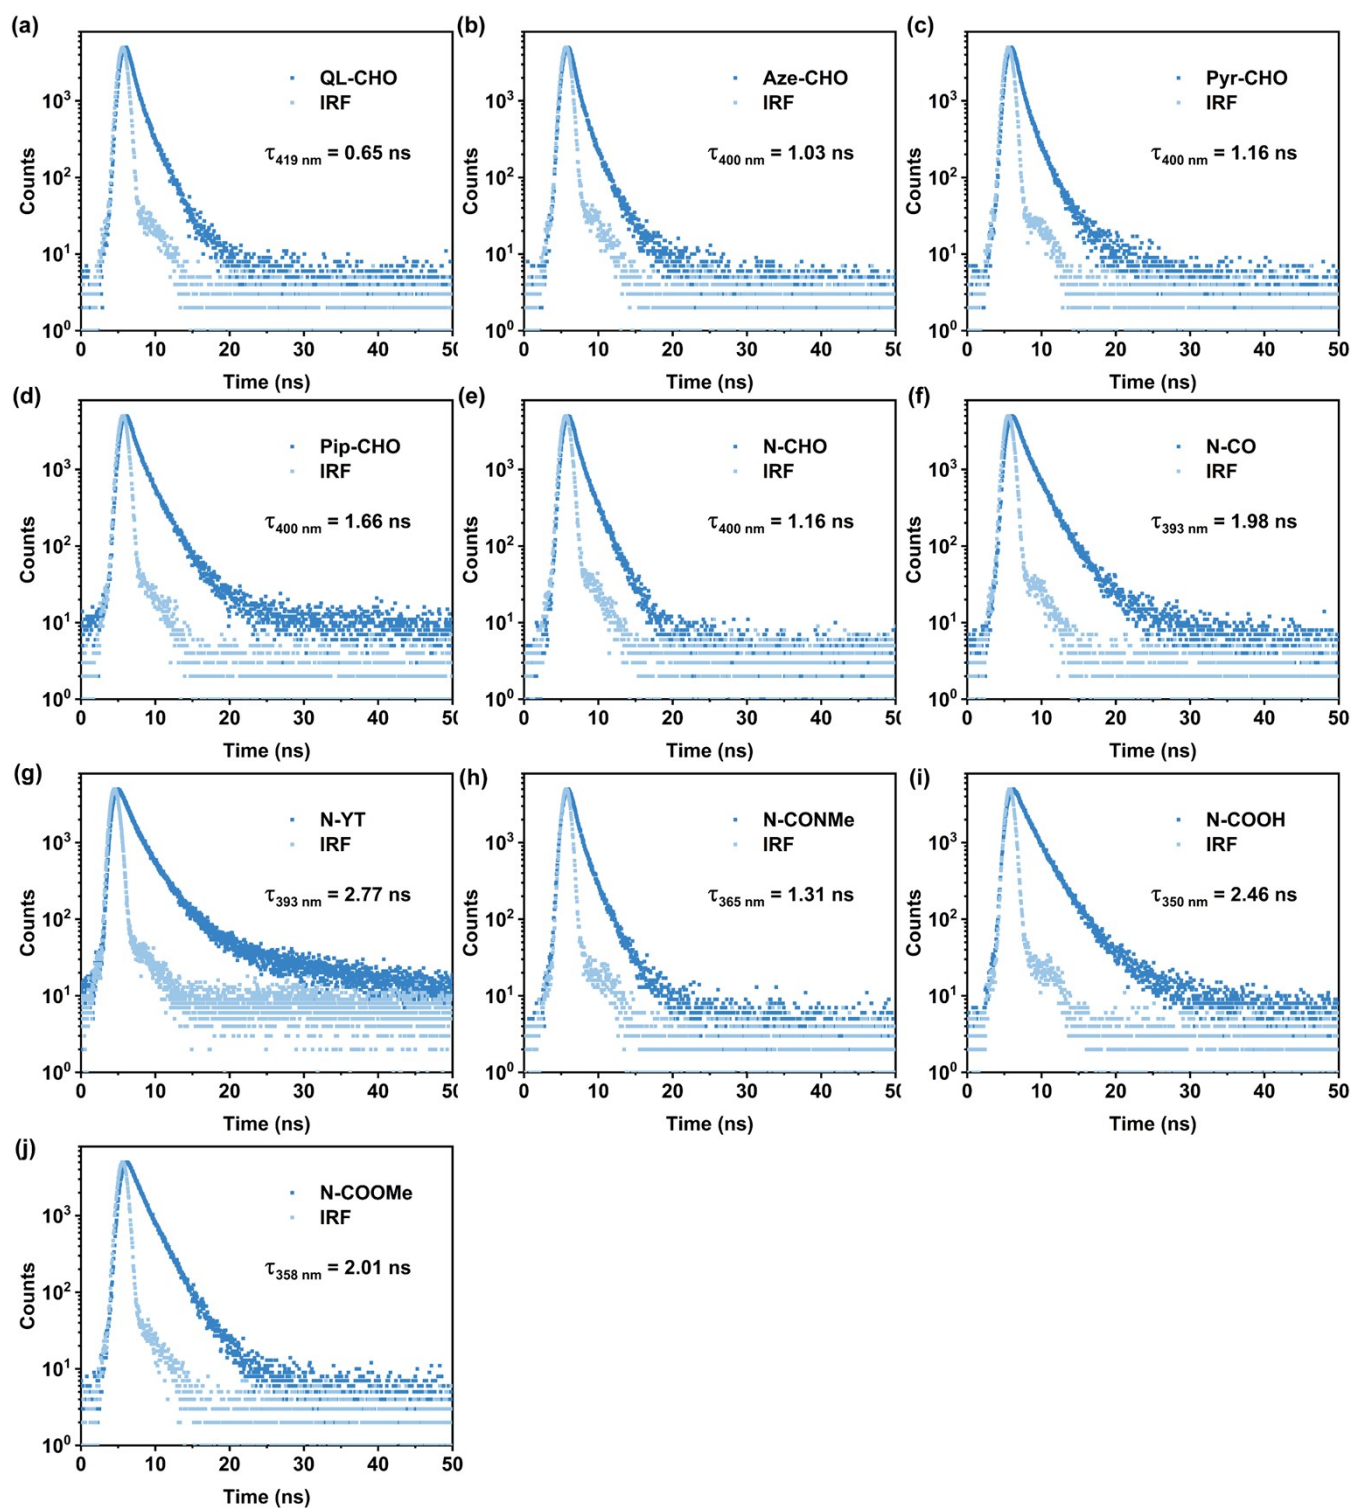

**Fig. S9** The fluorescence decay curves of (a) QL-CHO, (b) Aze-CHO, (c) Pyr-CHO, (d) Pip-CHO, (e) N-CHO, (f) N-CO, (g) N-YT, (h) N-CONMe, (i) N-COOH, and (j) N-COOMe doped PVA films with doping concentration of 1 wt%.

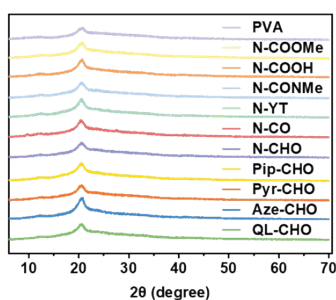

**Fig. S10** The powder X-ray diffraction patterns of SBL@PVAs and PVA.

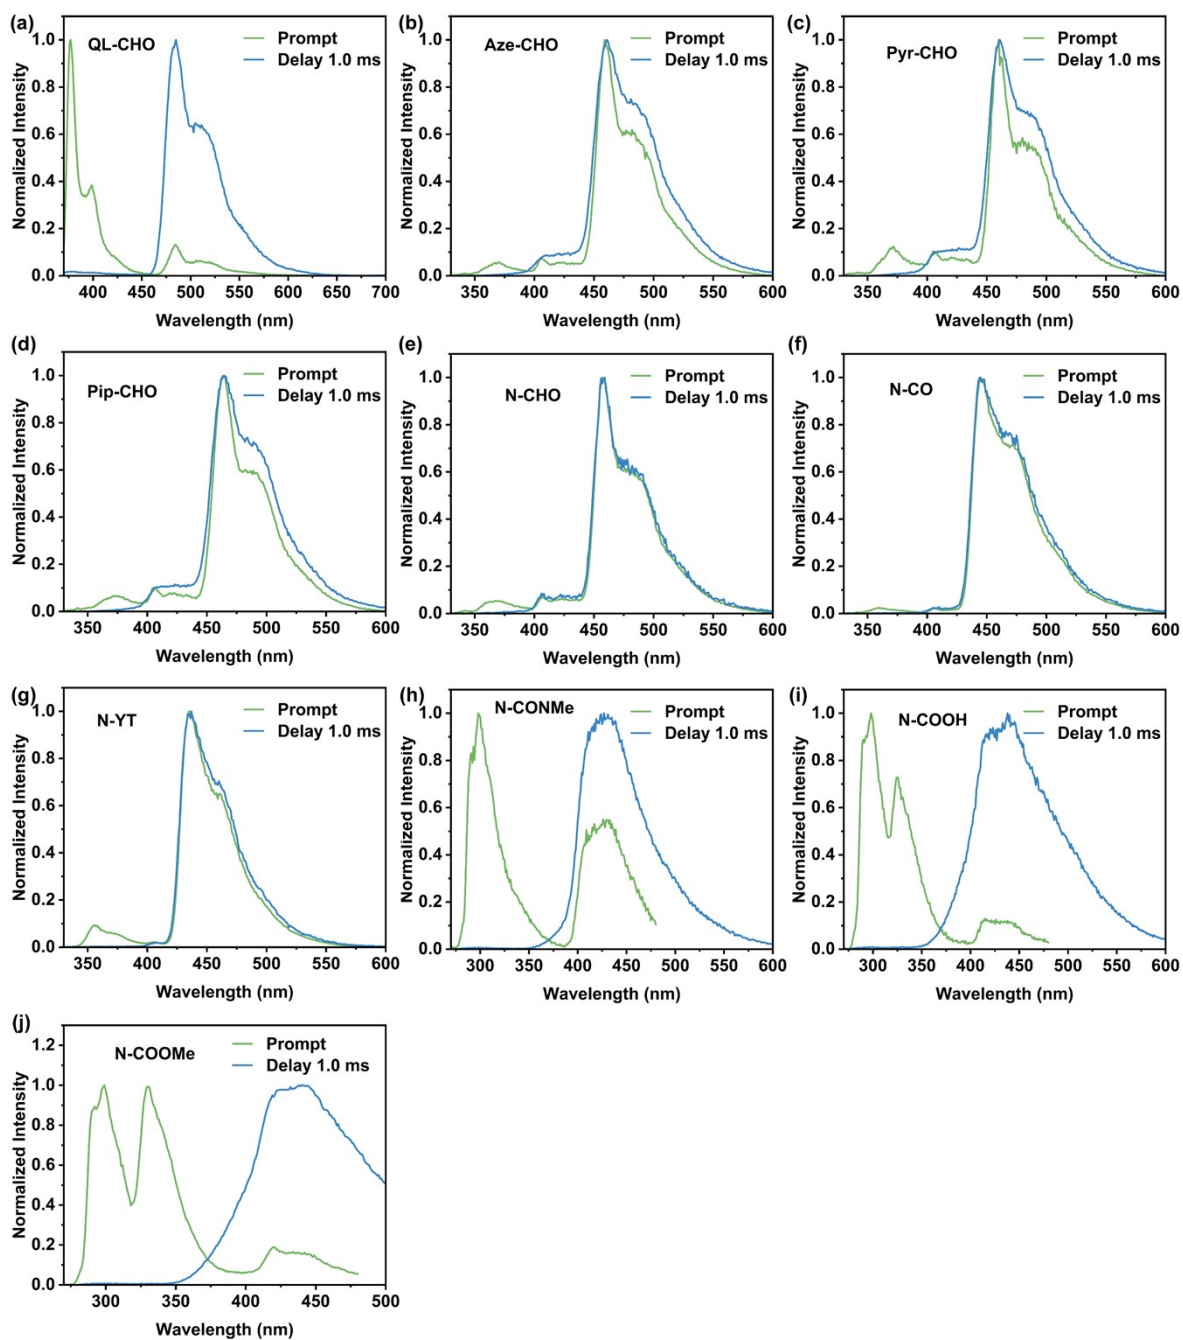

**Fig. S11** The prompt and delay emission (delay time: 1.0 ms) spectra of (a) QL-CHO, (b) Aze-CHO, (c) Pyr-CHO, (d) Pip-CHO, (e) N-CHO, (f) N-CO, (g) N-YT, (h) N-CONMe, (i) N-COOH, and (j) N-COOMe in dilute 2-methyltetrahydrofuran solution at 77 K,  $C = 3 \times 10^{-4}$  mol/L.

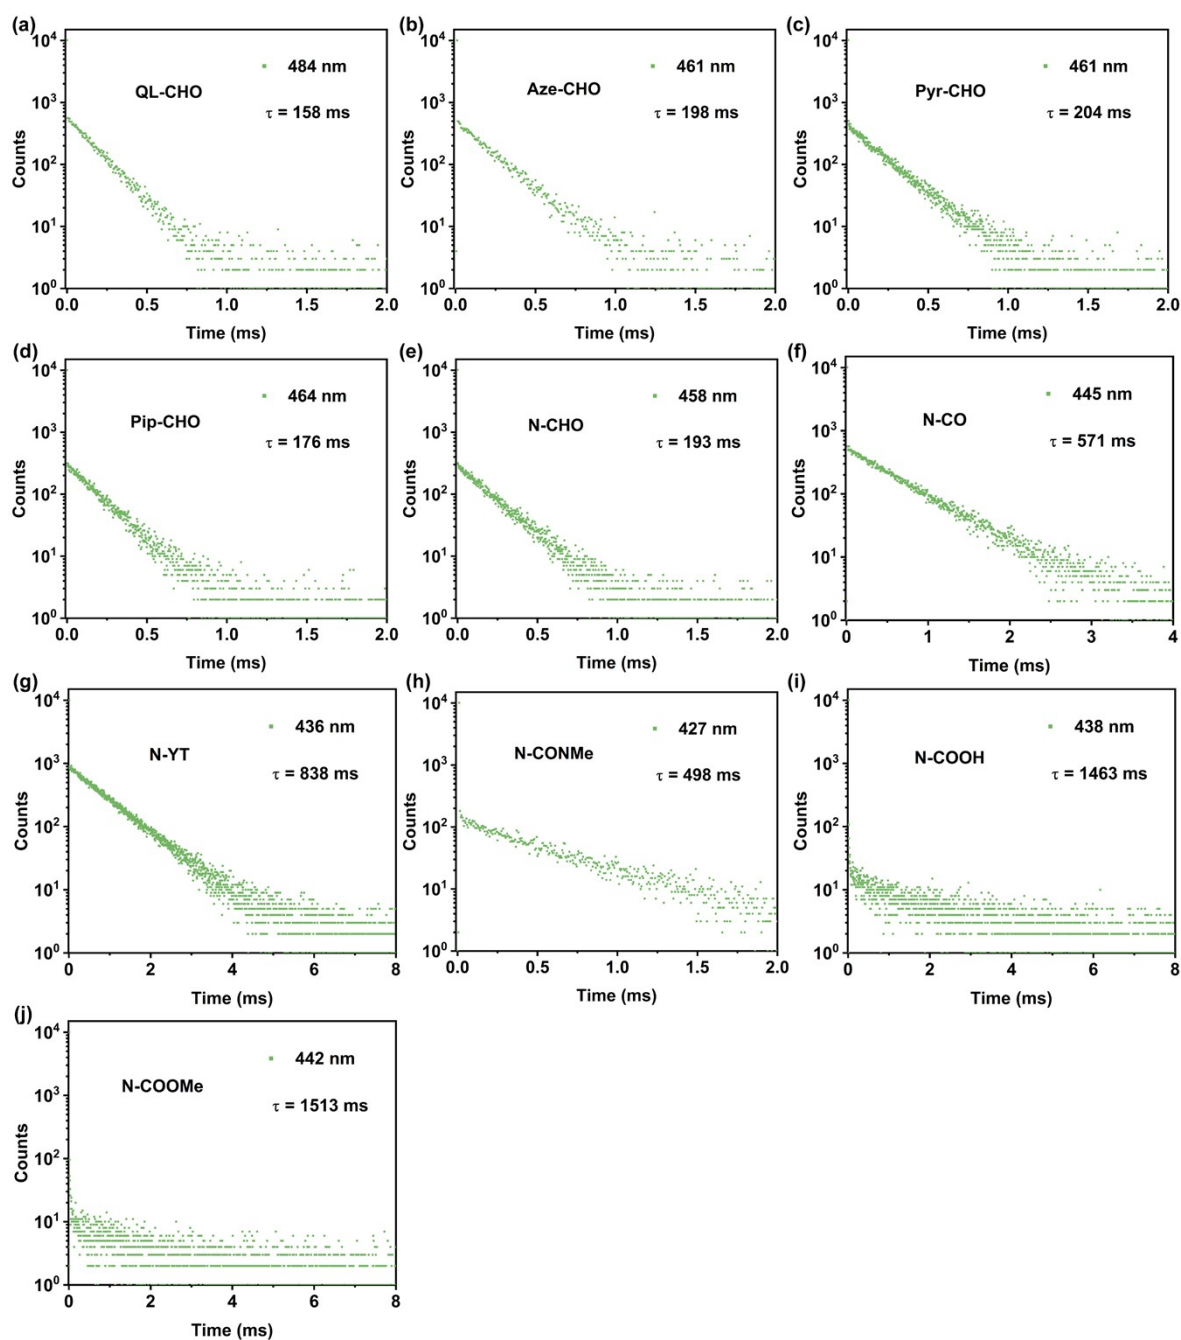

**Fig. S12** The phosphorescence decay curves of (a) QL-CHO, (b) Aze-CHO, (c) Pyr-CHO, (d) Pip-CHO, (e) N-CHO, (f) N-CO, (g) N-YT, (h) N-CONMe, (i) N-COOH, and (j) N-COOMe in dilute 2-methyltetrahydrofuran solution at 77 K,  $C = 3 \times 10^{-4}$  mol/L.

**Table S1** The single crystal data of **N-CHO**, **N-CO**, and **N-COOMe** crystals.

| Compound                                          | N-CHO                             |             | N-CO                                          |            | N-COOMe                                         |             |
|---------------------------------------------------|-----------------------------------|-------------|-----------------------------------------------|------------|-------------------------------------------------|-------------|
| <b>Empirical formula</b>                          | C <sub>9</sub> H <sub>11</sub> NO |             | C <sub>10</sub> H <sub>13</sub> NO            |            | C <sub>10</sub> H <sub>13</sub> NO <sub>2</sub> |             |
| <b>Formula weight</b>                             | 149.19                            |             | 163.21                                        |            | 179.21                                          |             |
| <b>Temperature / K</b>                            | 120.25(10)                        |             | 120.20(10)                                    |            | 120.05(10)                                      |             |
| <b>Crystal system</b>                             | monoclinic                        |             | orthorhombic                                  |            | orthorhombic                                    |             |
| <b>Space group</b>                                | P2 <sub>1</sub> /n                |             | P2 <sub>1</sub> 2 <sub>1</sub> 2 <sub>1</sub> |            | P2 <sub>1</sub> 2 <sub>1</sub> 2 <sub>1</sub>   |             |
| <b>Unit cell dimensions</b>                       | a/Å                               | 10.3059(5)  | a/Å                                           | 5.6298(10) | a/Å                                             | 6.0983(5)   |
|                                                   | b/Å                               | 7.5527(4)   | b/Å                                           | 7.9243(18) | b/Å                                             | 7.3384(7)   |
|                                                   | c/Å                               | 20.5225(12) | c/Å                                           | 19.897(4)  | c/Å                                             | 20.8985(17) |
|                                                   | α/°                               | 90.00       | α/°                                           | 90.00      | α/°                                             | 90.00       |
|                                                   | β/°                               | 97.542(5)   | β/°                                           | 90.00      | β/°                                             | 90.00       |
|                                                   | γ/°                               | 90.00       | γ/°                                           | 90.00      | γ/°                                             | 90.00       |
| <b>Volume / Å<sup>3</sup></b>                     | 1583.59(15)                       |             | 887.6(3)                                      |            | 935.24(14)                                      |             |
| <b>Z</b>                                          | 8                                 |             | 4                                             |            | 4                                               |             |
| <b>ρ<sub>calc</sub> / mg mm<sup>-3</sup></b>      | 1.251                             |             | 1.221                                         |            | 1.273                                           |             |
| <b>μ / mm<sup>-1</sup></b>                        | 0.082                             |             | 0.079                                         |            | 0.089                                           |             |
| <b>F(000)</b>                                     | 640                               |             | 352                                           |            | 384                                             |             |
| <b>Crystal size / mm<sup>3</sup></b>              | 0.34 × 0.26 × 0.13                |             | 0.35 × 0.34 × 0.01                            |            | 0.33 × 0.31 × 0.04                              |             |
| <b>2θ range for data collection</b>               | 6.7 to 52°                        |             | 6.58 to 51.94°                                |            | 6.78 to 52°                                     |             |
| <b>Index ranges</b>                               | -11 ≤ h ≤ 12                      |             | -6 ≤ h ≤ 5                                    |            | -5 ≤ h ≤ 7                                      |             |
|                                                   | -7 ≤ k ≤ 9                        |             | -6 ≤ k ≤ 9                                    |            | -8 ≤ k ≤ 6                                      |             |
|                                                   | -23 ≤ l ≤ 24                      |             | -24 ≤ l ≤ 24                                  |            | -24 ≤ l ≤ 25                                    |             |
| <b>Reflections collected</b>                      | 7724                              |             | 3542                                          |            | 3820                                            |             |
| <b>Independent reflections</b>                    | 3081                              |             | 1698                                          |            | 1798                                            |             |
| <b>Data/restraints/parameters</b>                 | 3081/0/203                        |             | 1698/0/112                                    |            | 1798/0/122                                      |             |
| <b>Goodness-of-fit on F<sup>2</sup></b>           | 1.047                             |             | 0.990                                         |            | 1.043                                           |             |
| <b>Final R indexes [I&gt;2σ (I)]</b>              | R <sub>1</sub> = 0.0601           |             | R <sub>1</sub> = 0.0612                       |            | R <sub>1</sub> = 0.0492                         |             |
|                                                   | wR <sub>2</sub> = 0.1133          |             | wR <sub>2</sub> = 0.1032                      |            | wR <sub>2</sub> = 0.0898                        |             |
| <b>Final R indexes [all data]</b>                 | R <sub>1</sub> = 0.1178           |             | R <sub>1</sub> = 0.1044                       |            | R <sub>1</sub> = 0.0670                         |             |
|                                                   | wR <sub>2</sub> = 0.1485          |             | wR <sub>2</sub> = 0.1257                      |            | wR <sub>2</sub> = 0.1006                        |             |
| <b>Largest diff. peak/hole / e Å<sup>-3</sup></b> | 0.197/-0.248                      |             | 0.148/-0.160                                  |            | 0.153/-0.148                                    |             |
| <b>Completeness</b>                               | 0.9971                            |             | 0.9939                                        |            | 0.9951                                          |             |
| <b>CCDC</b>                                       | 2519407                           |             | 2518935                                       |            | 2519406                                         |             |

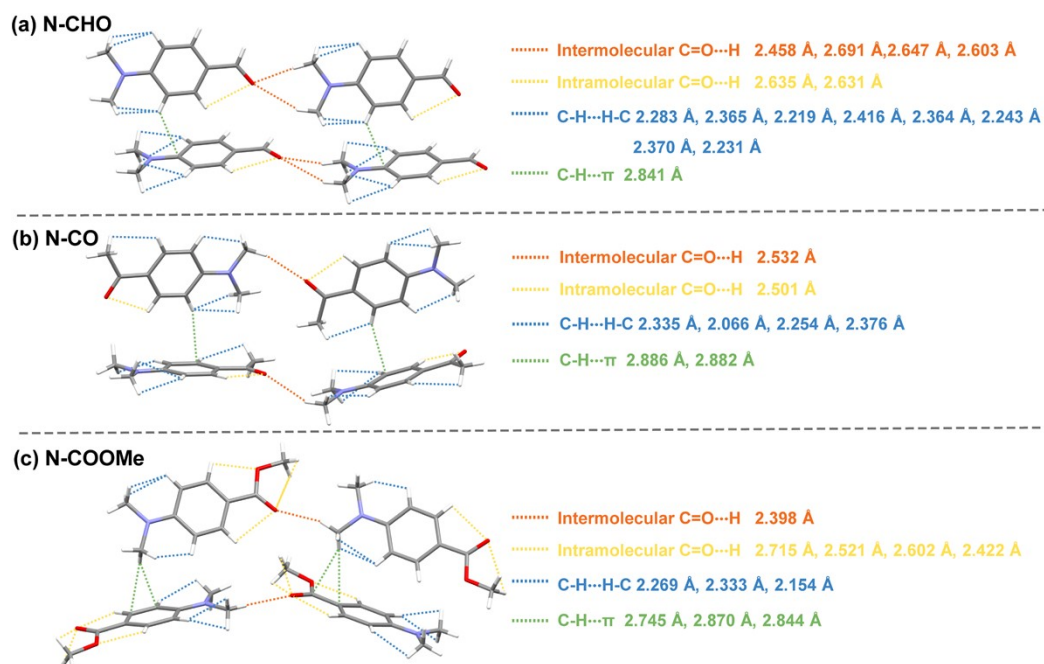

**Fig. S13** The molecular stacking and intermolecular/intramolecular interactions of (a) N-CHO, (b) N-CO, and (c) N-COOMe crystals.

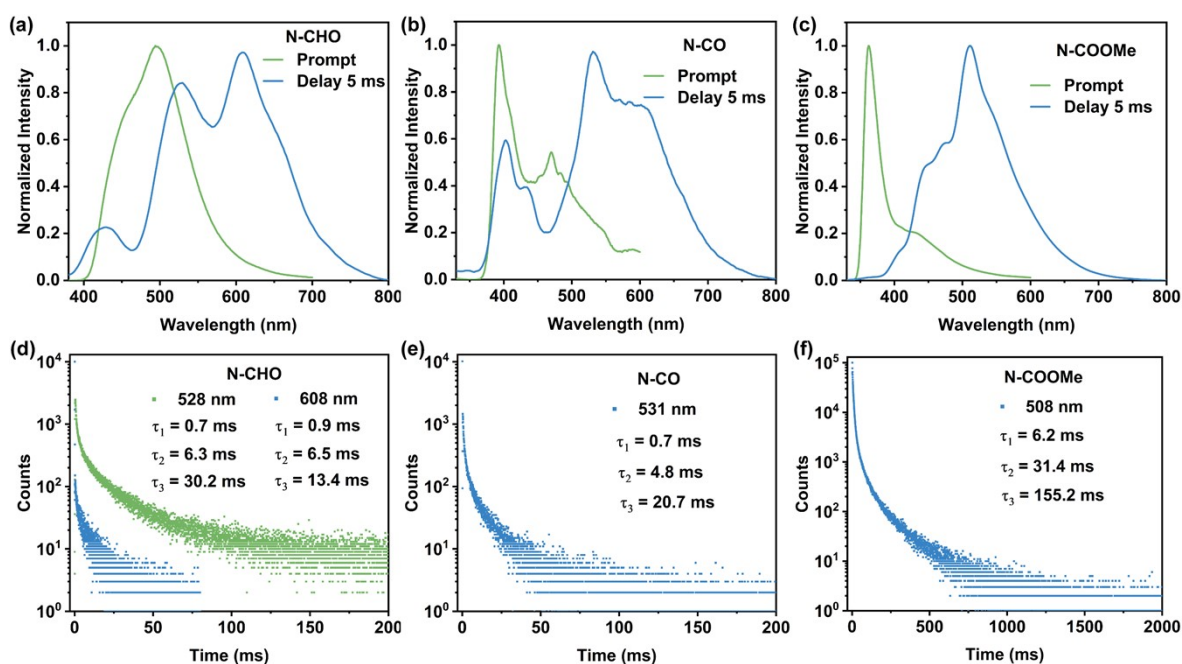

**Fig. S14** The prompt and delay emission (delay time: 5.0 ms) spectra of (a) N-CHO, (b) N-CO, and (c) N-COOMe crystals; the phosphorescence decay curves of (d) N-CHO, (e) N-CO, and (f) N-COOMe crystals;  $\lambda_{\text{ex}} = 310$  nm.

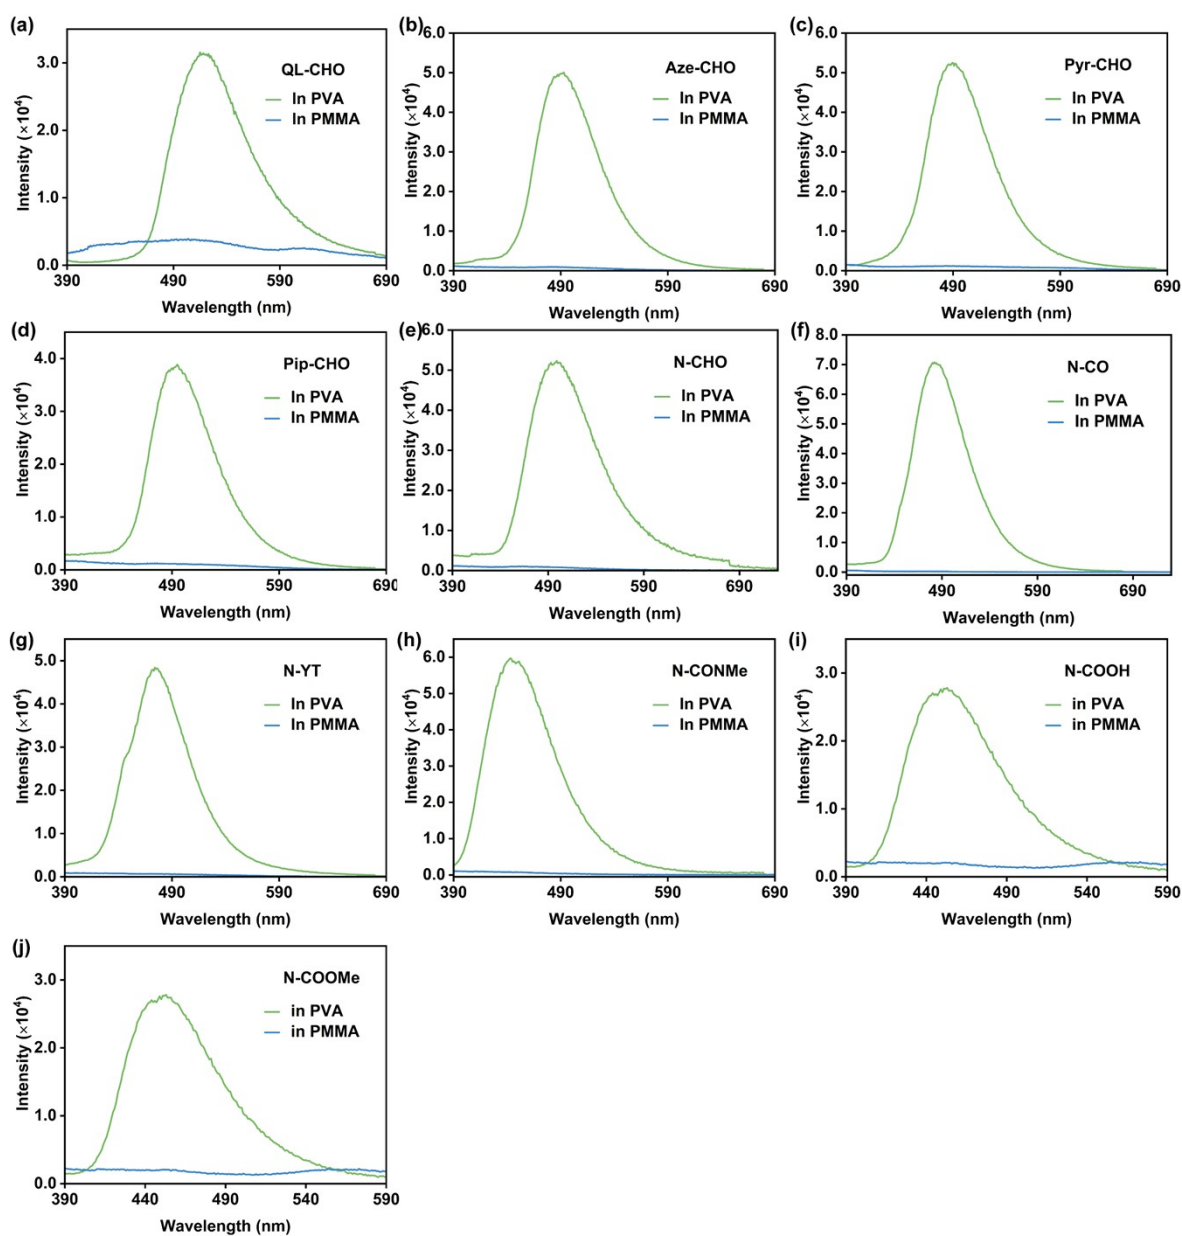

**Fig. S15** The phosphorescence spectra of (a) QL-CHO, (b) Aze-CHO, (c) Pyr-CHO, (d) Pip-CHO, (e) N-CHO, (f) N-CO, (g) N-YT, (h) N-CONMe, (i) N-COOH, and (j) N-COOMe doped into PVA and PMMA with doping concentration of 1 wt%, delay time = 20 ms.

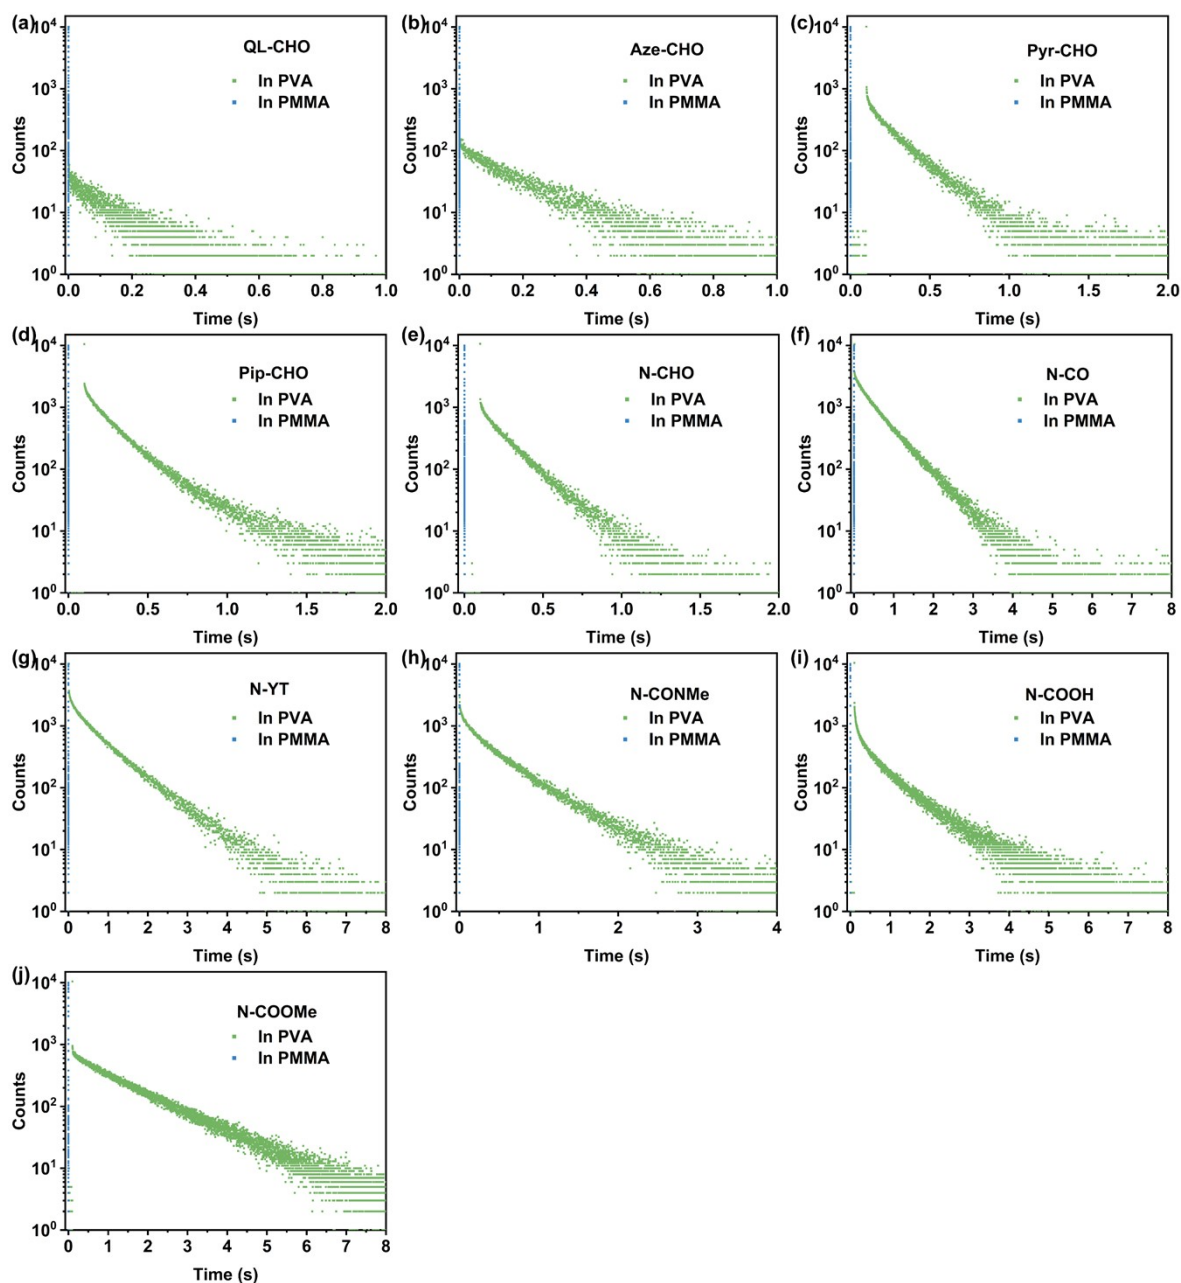

**Fig. S16** The phosphorescence decay curves of (a) **QL-CHO**, (b) **Aze-CHO**, (c) **Pyr-CHO**, (d) **Pip-CHO**, (e) **N-CHO**, (f) **N-CO**, (g) **N-YT**, (h) **N-CONMe**, (i) **N-COOH**, and (j) **N-COOMe** doped into PVA and PMMA with doping concentration of 1 wt%.

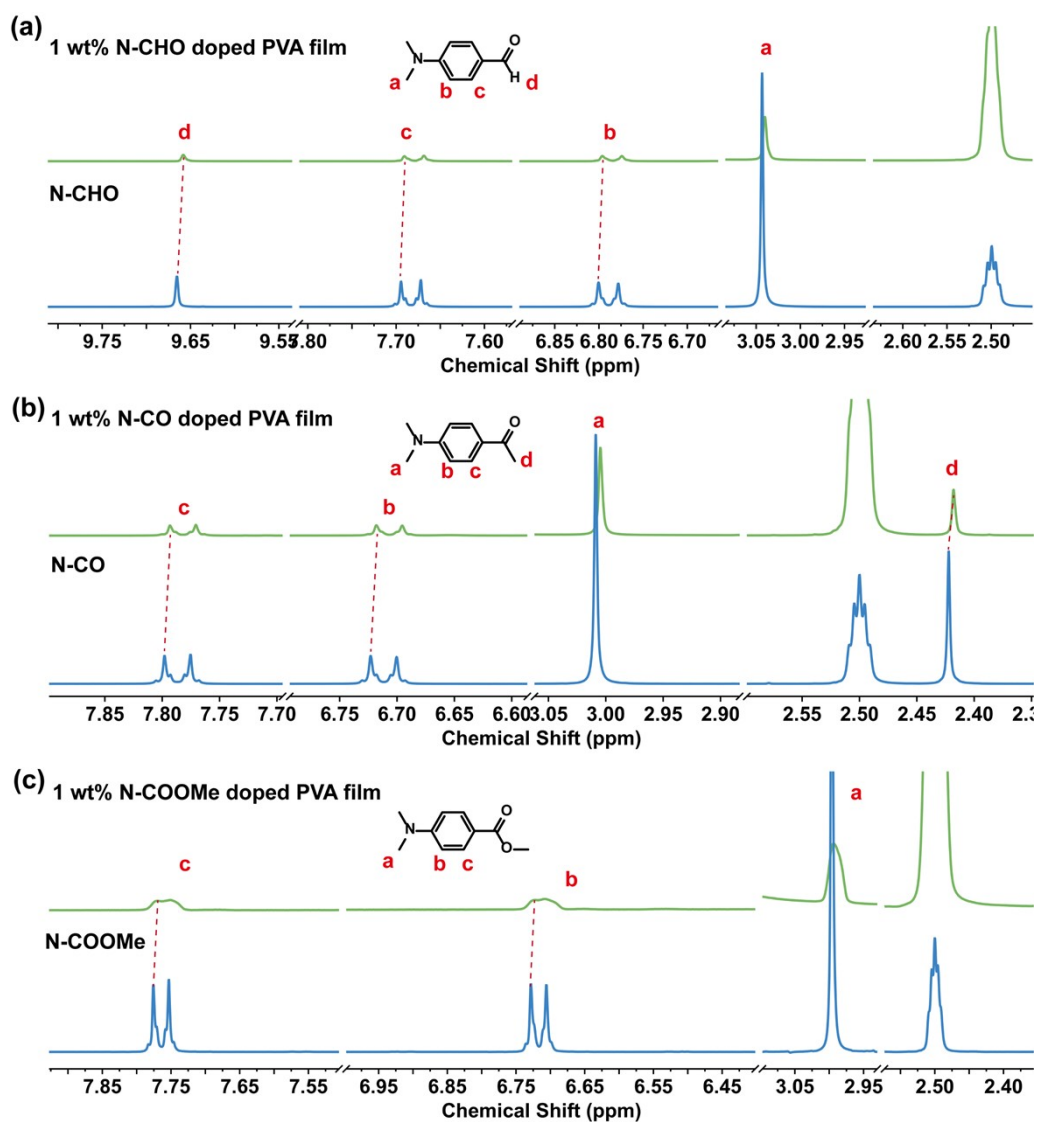

**Fig. S17** The  $^1\text{H}$  NMR spectra of (a) **N-CHO** and **N-CHO** doped PVA film, (b) **N-CO** and **N-CO** doped PVA film, and (c) **N-COOMe** and **N-COOMe** doped PVA film in  $\text{DMSO-}d_6$  with doping concentration of 1 wt%.

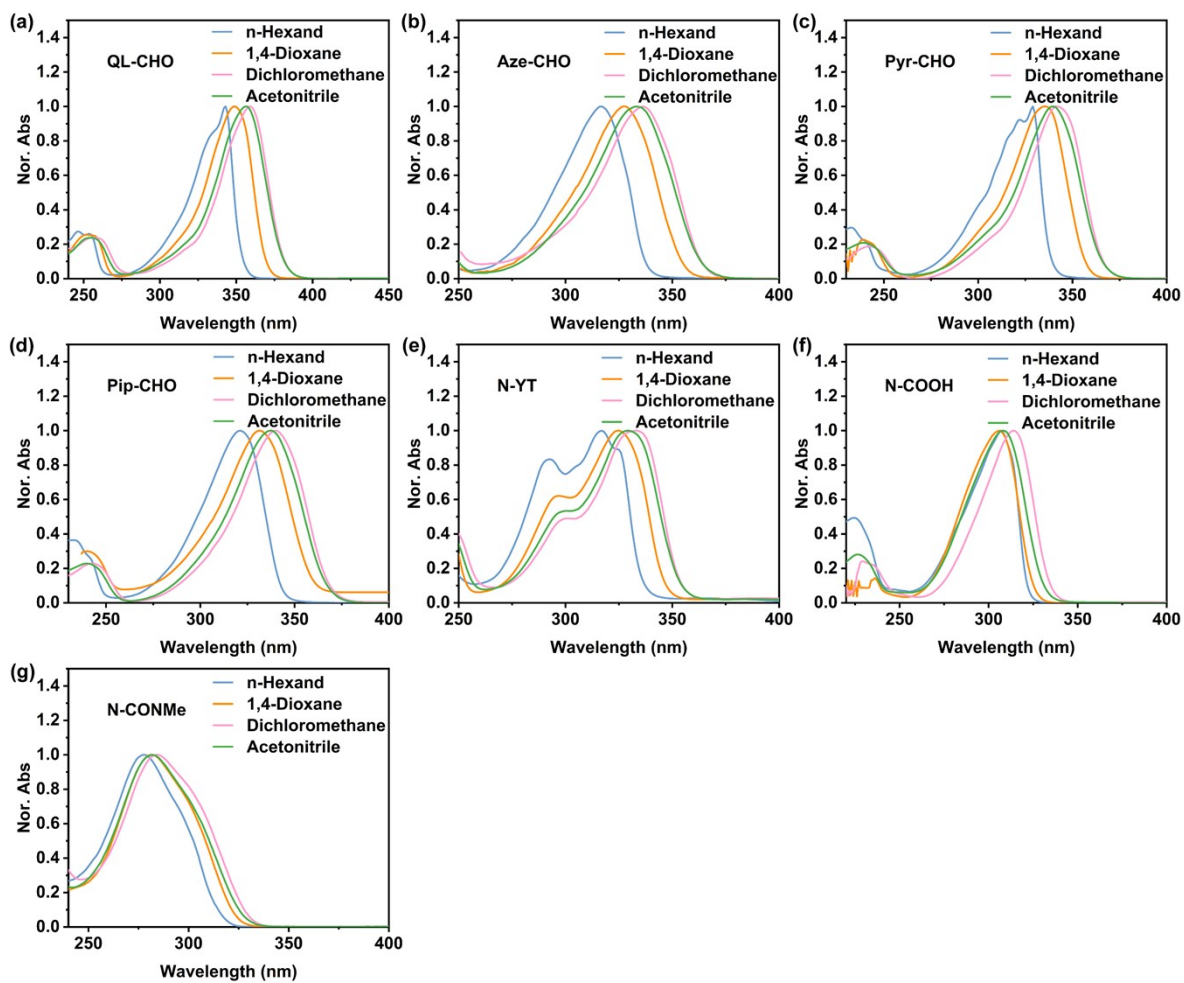

**Fig. S18** The absorption spectra of (a) QL-CHO, (b) Aze-CHO, (c) Pyr-CHO, (d) Pip-CHO, (e) N-YT, (f) N-COOH, and (g) N-CONMe in different solvents,  $C = 5 \times 10^{-5}$  mol/L.

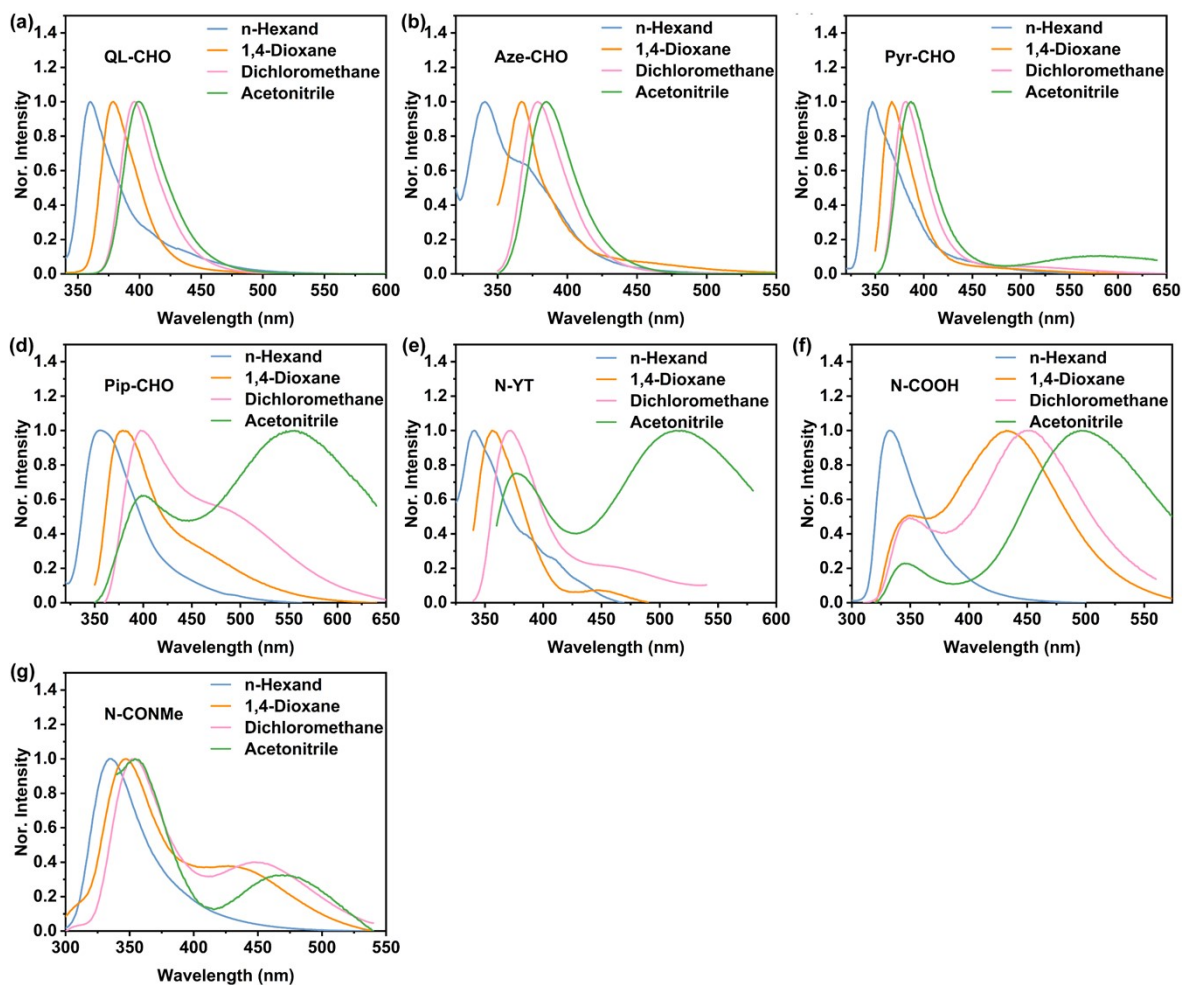

**Fig. S19** The fluorescence spectra of (a) **QL-CHO**, (b) **Aze-CHO**, (c) **Pyr-CHO**, (d) **Pip-CHO**, (e) **N-YT**, (f) **N-COOH**, and (g) **N-CONMe** in different solvents,  $C = 5 \times 10^{-5}$  mol/L.

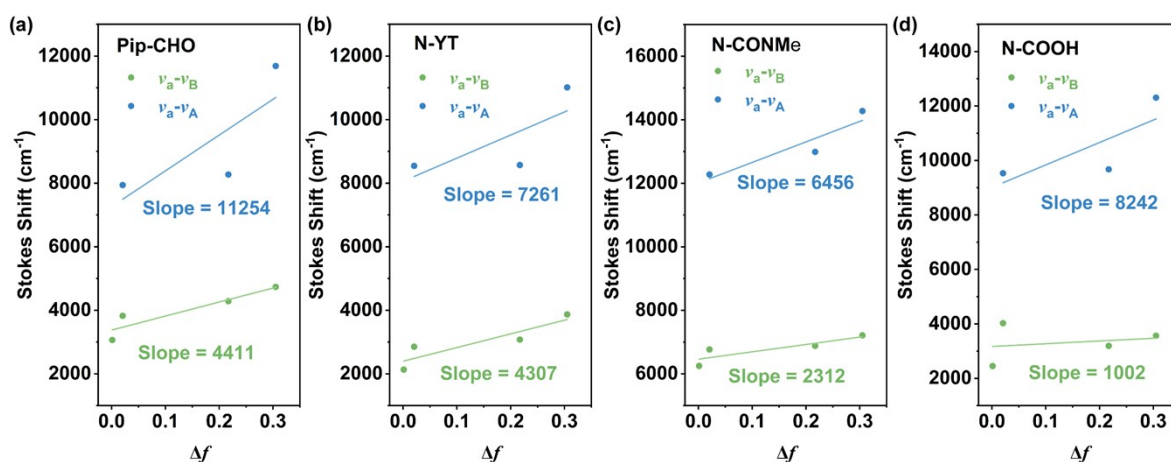

**Fig. S20** The relationships between the Stokes shifts and  $\Delta f$  for (a) **Pip-CHO**, (b) **N-YT**, (c) **N-CONMe**, and (d) **N-COOH**.

**Table S2** The photophysical properties of ten single benzene molecules in different solvents.

| Compound | Solvent         | $\Delta f^a$ | $\lambda_a$<br>[nm] | $\lambda_B$<br>[nm] | $\nu_a-\nu_B$<br>[cm <sup>-1</sup> ] | $\lambda_A$<br>[nm] | $\nu_a-\nu_A$<br>[cm <sup>-1</sup> ] |
|----------|-----------------|--------------|---------------------|---------------------|--------------------------------------|---------------------|--------------------------------------|
| QL-CHO   | n-Hexane        | 0.0012       | 343                 | 360                 | 1377                                 | --                  | --                                   |
|          | 1,4-Dioxane     | 0.0206       | 349                 | 379                 | 2268                                 | --                  | --                                   |
|          | Dichloromethane | 0.217        | 359                 | 396                 | 2603                                 | --                  | --                                   |
|          | Acetonitrile    | 0.305        | 356                 | 399                 | 3027                                 | --                  | --                                   |
| Aze-CHO  | n-Hexane        | 0.0012       | 316                 | 341                 | 2320                                 | 367                 | 4398                                 |
|          | 1,4-Dioxane     | 0.0206       | 327                 | 367                 | 3333                                 | 455                 | 8603                                 |
|          | Dichloromethane | 0.217        | 336                 | 379                 | 3377                                 | --                  | --                                   |
|          | Acetonitrile    | 0.305        | 333                 | 385                 | 4056                                 | --                  | --                                   |
| Pyr-CHO  | n-Hexane        | 0.0012       | 329                 | 347                 | 1577                                 | --                  | --                                   |
|          | 1,4-Dioxane     | 0.0206       | 335                 | 367                 | 2603                                 | --                  | --                                   |
|          | Dichloromethane | 0.217        | 342                 | 381                 | 2993                                 | 489                 | 8790                                 |
|          | Acetonitrile    | 0.305        | 339                 | 387                 | 3659                                 | 583                 | 12346                                |
| Pip-CHO  | n-Hexane        | 0.0012       | 321                 | 356                 | 3063                                 | --                  | --                                   |
|          | 1,4-Dioxane     | 0.0206       | 331                 | 379                 | 3827                                 | 449                 | 7940                                 |
|          | Dichloromethane | 0.217        | 340                 | 398                 | 4286                                 | 473                 | 8270                                 |
|          | Acetonitrile    | 0.305        | 337                 | 401                 | 4736                                 | 556                 | 11688                                |
| N-CHO    | n-Hexane        | 0.0012       | 324                 | 343                 | 1710                                 | 369                 | 3764                                 |
|          | 1,4-Dioxane     | 0.0206       | 330                 | 359                 | 2448                                 | 451                 | 8130                                 |
|          | Dichloromethane | 0.217        | 338                 | 381                 | 3339                                 | 479                 | 8709                                 |
|          | Acetonitrile    | 0.305        | 336                 | 389                 | 4055                                 | 568                 | 12156                                |
| N-CO     | n-Hexane        | 0.0012       | 314                 | 342                 | 2607                                 | 371                 | 4893                                 |
|          | 1,4-Dioxane     | 0.0206       | 322                 | 357                 | 3045                                 | 427                 | 7637                                 |
|          | Dichloromethane | 0.217        | 330                 | 375                 | 3636                                 | 456                 | 8373                                 |
|          | Acetonitrile    | 0.305        | 326                 | 381                 | 4428                                 | 530                 | 11807                                |
| N-YT     | n-Hexane        | 0.0012       | 317                 | 340                 | 2134                                 | --                  | --                                   |
|          | 1,4-Dioxane     | 0.0206       | 324                 | 357                 | 2853                                 | 448                 | 8543                                 |
|          | Dichloromethane | 0.217        | 333                 | 371                 | 3076                                 | 466                 | 8571                                 |
|          | Acetonitrile    | 0.305        | 329                 | 377                 | 3870                                 | 516                 | 11015                                |
| N-CONMe  | n-Hexane        | 0.0012       | 277                 | 335                 | 6250                                 | --                  | --                                   |
|          | 1,4-Dioxane     | 0.0206       | 281                 | 347                 | 6769                                 | 429                 | 12277                                |
|          | Dichloromethane | 0.217        | 284                 | 353                 | 6883                                 | 450                 | 12989                                |
|          | Acetonitrile    | 0.305        | 282                 | 354                 | 7212                                 | 472                 | 14275                                |
| N-COOH   | n-Hexane        | 0.0012       | 307                 | 332                 | 2453                                 | --                  | --                                   |
|          | 1,4-Dioxane     | 0.0206       | 306                 | 349                 | 4026                                 | 432                 | 9532                                 |
|          | Dichloromethane | 0.217        | 314                 | 349                 | 3194                                 | 451                 | 9674                                 |
|          | Acetonitrile    | 0.305        | 308                 | 346                 | 3566                                 | 496                 | 12306                                |
| N-COOMe  | n-Hexane        | 0.0012       | 299                 | 331                 | 3233                                 | --                  | --                                   |
|          | 1,4-Dioxane     | 0.0206       | 307                 | 349                 | 3920                                 | 431                 | 9371                                 |
|          | Dichloromethane | 0.217        | 310                 | 355                 | 4089                                 | 436                 | 9322                                 |
|          | Acetonitrile    | 0.305        | 308                 | 350                 | 3896                                 | 490                 | 12059                                |

<sup>a</sup>  $\Delta f = \frac{\varepsilon - 1}{2\varepsilon + 1} - \frac{n^2 - 1}{2n^2 + 1}$ , where the  $\varepsilon$  and  $n$  are the dielectric constant and refractive index of the solvents, respectively.<sup>10</sup>

**Table S3** The dielectric constant and refractive index of the solvents.

| Solvents        | $\epsilon$ | $n$   |
|-----------------|------------|-------|
| n-Hexane        | 1.9        | 1.375 |
| 1,4-Dioxane     | 2.21       | 1.422 |
| Dichloromethane | 8.93       | 1.424 |
| Acetonitrile    | 37.5       | 1.344 |

**Table S4** The  $S_0$  to  $S_1$  transition electric dipole moment  $\mu$  for N-CHO, N-CO, and N-COOMe in different solvents.

| Compound | Solvent         | x [a.u.] | y [a.u.] | z [a.u.] | $\mu$ [Debye] |
|----------|-----------------|----------|----------|----------|---------------|
| N-CHO    | n-Hexane        | 0.0001   | 0.0000   | -0.0433  | 0.11          |
|          | 1,4-Dioxane     | 0.0001   | 0.0000   | -0.0439  | 0.11          |
|          | Dichloromethane | 2.9625   | 0.2946   | -0.0002  | 7.57          |
|          | Acetonitrile    | 3.0784   | 0.3207   | 0.0002   | 7.87          |
| N-CO     | n-Hexane        | 0.0002   | 0.0000   | 0.0389   | 0.10          |
|          | 1,4-Dioxane     | -0.0003  | -0.0000  | -0.0398  | 0.10          |
|          | Dichloromethane | -2.9211  | -0.0828  | -0.0000  | 7.43          |
|          | Acetonitrile    | -3.0280  | -0.0725  | 0.0000   | 7.70          |
| N-COOMe  | n-Hexane        | -2.5364  | -0.1735  | 0.0002   | 6.46          |
|          | 1,4-Dioxane     | -2.5995  | -0.1799  | 0.0002   | 6.62          |
|          | Dichloromethane | -2.9511  | -0.2225  | 0.0008   | 7.52          |
|          | Acetonitrile    | -3.0517  | -0.2305  | 0.0009   | 7.78          |

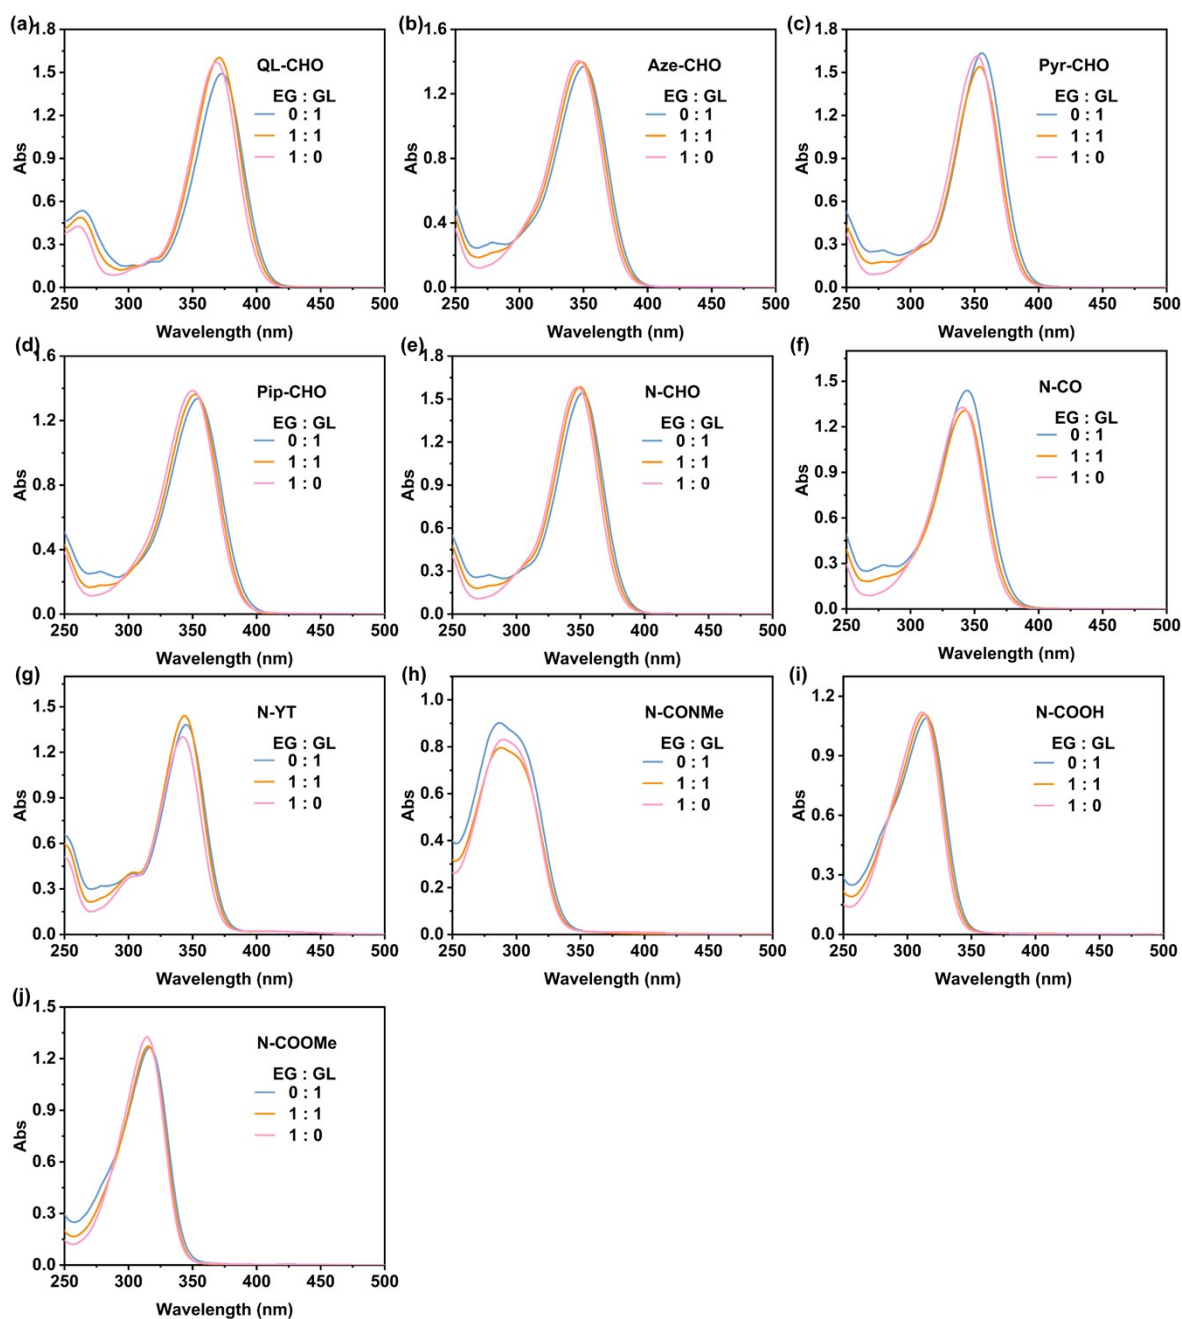

**Fig. S21** The absorption spectra of (a) QL-CHO, (b) Aze-CHO, (c) Pyr-CHO, (d) Pip-CHO, (e) N-CHO, (f) N-CO, (g) N-YT, (h) N-CONMe, (i) N-COOH, and (j) N-COOMe in solutions with different viscosities (EG: ethylene glycol, GL: glycerol),  $C = 5 \times 10^{-5}$  mol/L.

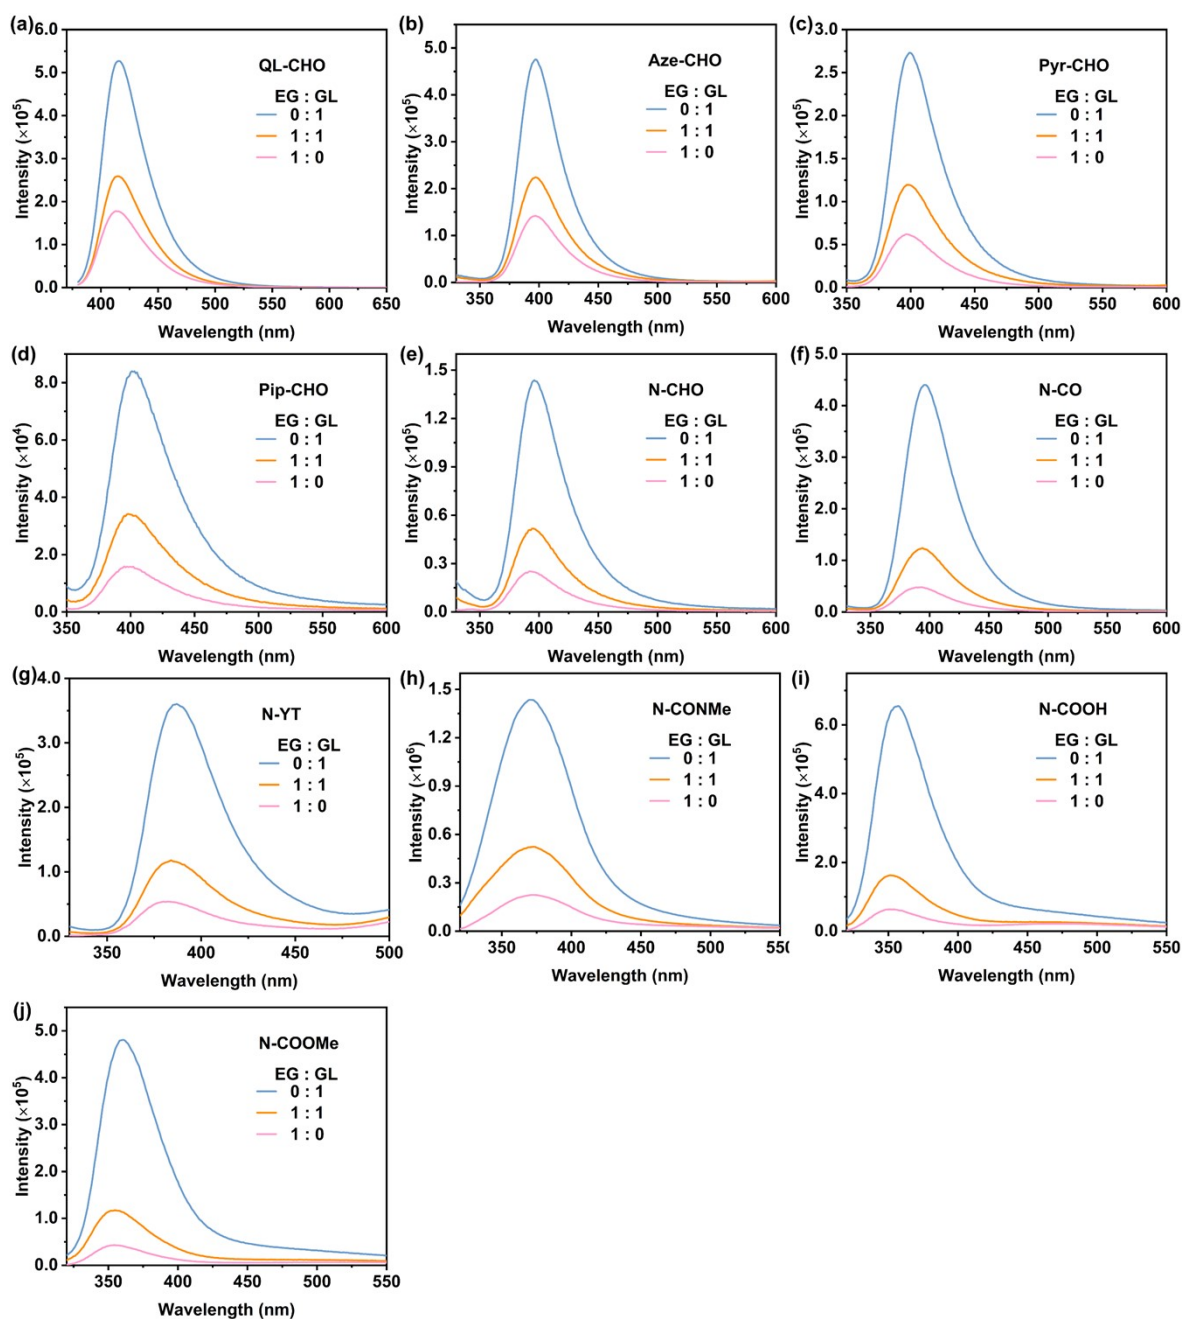

**Fig. S22** The fluorescence spectra of (a) **QL-CHO**, (b) **Aze-CHO**, (c) **Pyr-CHO**, (d) **Pip-CHO**, (e) **N-CHO**, (f) **N-CO**, (g) **N-YT**, (h) **N-CONMe**, (i) **N-COOH**, and (j) **N-COOMe** in solutions with different viscosities (EG: ethylene glycol, GL: glycerol),  $C = 5 \times 10^{-5}$  mol/L.

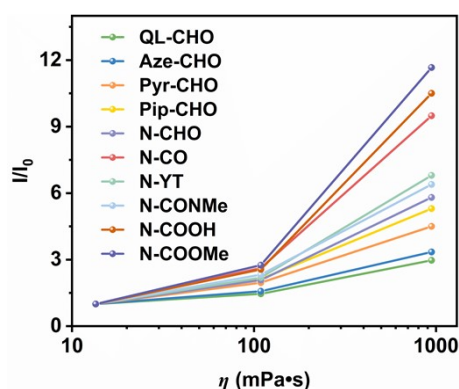

**Fig. S23** The relationship between the viscosity ( $\eta$ ) and fluorescence intensity ratio ( $I/I_0$ ),  $I_0$  is the fluorescence intensity of compound in EG,  $I$  is the fluorescence intensity of compound in solutions with varying viscosity,  $\eta$  is the viscosity of solution (In 25 °C, 13.5 mPa·s for EG, 109.0 mPa·s for EG /GL with volume ratio of 1:1, and 945 mPa·s for GL)

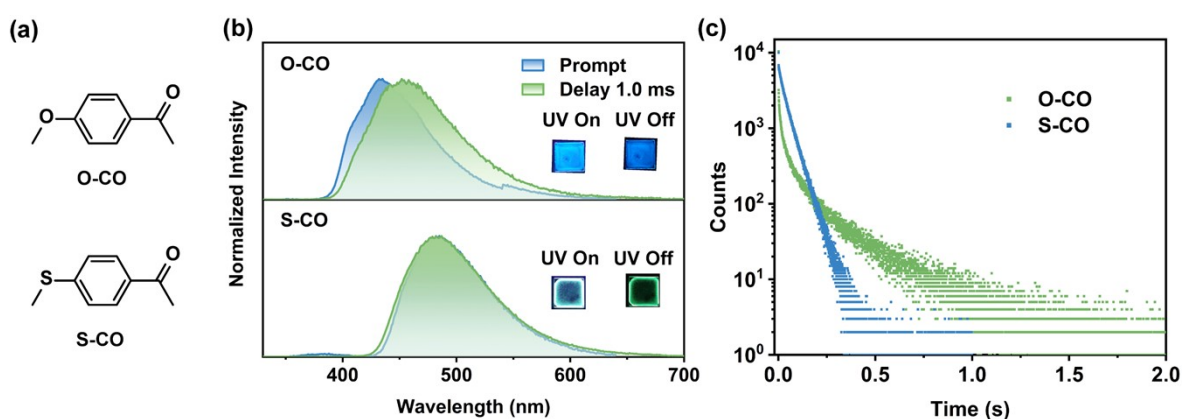

**Fig. S24** (a) The chemical structures of **O-CO** and **S-CO**. (b) The normalized prompt and delay emission spectra (delay time = 1.0 ms), insert: the photographs of **O-CO** and **S-CO** doped PVA films before and after removal of the 254 nm or 365 nm UV lamp. (c) The phosphorescence decay curves of **O-CO** and **S-CO** doped PVA films.

**Table S5** The photophysical properties of **O-CO** and **S-CO** doped PVA films.

| Compound    | $\Phi_{\text{Total}}$ [%] | $\lambda_{\text{P}}$ [nm] | $\tau_{\text{P}}$ [ms] | $\Phi_{\text{P}}$ [%] |
|-------------|---------------------------|---------------------------|------------------------|-----------------------|
| <b>O-CO</b> | 5.47                      | 454                       | 139                    | 2.85                  |
| <b>S-CO</b> | 56.22                     | 483                       | 46                     | 56.22                 |

**Table S6.** The calculated wavelengths of  $S_1$  and  $T_1$  using representative hybrid functionals with different Hartree-Fock (HF) exact exchange contributions for **N-CHO**.

| Functionals | HF exact exchange contributions                    | $\lambda_{S_1}$ / nm | $\lambda_{T_1}$ / nm |
|-------------|----------------------------------------------------|----------------------|----------------------|
| B3LYP       | About 20%                                          | 324                  | 431                  |
| PBE0        | About 25%                                          | 383                  | 509                  |
| M06-2X      | About 54%                                          | 320                  | 388                  |
| CAM-B3LYP   | About 19 for short range and 65%<br>for long range | 305                  | 418                  |

**Table S7** The potential energy of lowest singlet excited state ( $S_1$ ) of **SBLs** (except for **QL-CHO** due to the difficult for rotation of the EDG) along with the different dihedral angles ( $\varphi$ ) between benzene ring and the EDG, unit: Hartree

| $\varphi$ | Aze-CHO   | Pyr-CHO   | Pip-CHO   | N-CHO     | N-CO      | N-YT      | N-CONMe   | N-COOH    | N-COOMe   |
|-----------|-----------|-----------|-----------|-----------|-----------|-----------|-----------|-----------|-----------|
| 0         | -517.0797 | -556.3893 | -595.6668 | -479.0242 | -518.3092 | -556.3945 | -612.9111 | -554.2062 | -593.4704 |
| 15        | -517.0804 | -556.3885 | -595.6655 | -479.0243 | -518.3098 | -556.3947 | -612.9113 | -554.2078 | -593.4737 |
| 30        | -517.0806 | -556.3865 | -595.6659 | -479.0236 | -518.3092 | -556.3940 | -612.9111 | -554.2098 | -593.4805 |
| 45        | -517.0794 | -556.3842 | -595.6668 | -479.0230 | -518.3087 | -556.3934 | -612.9110 | -554.2279 | -593.4887 |
| 60        | -517.0770 | -556.3824 | -595.6665 | -479.0220 | -518.3078 | -556.3927 | -612.9109 | -554.2343 | -593.4948 |
| 75        | -517.0738 | -556.3800 | -595.6648 | -479.0200 | -518.3059 | -556.3911 | -612.9098 | -554.2374 | -593.4976 |
| 90        | -517.0709 | -556.3775 | -595.6626 | -479.0177 | -518.3037 | -556.3893 | -612.9084 | -554.2382 | -593.4984 |
| 105       | -517.069  | -556.376  | -595.6612 | -479.0162 | -518.3023 | -556.3882 | -612.9077 | -554.2375 | -593.4977 |
| 120       | -517.0685 | -556.3758 | -595.6610 | -479.0160 | -518.3021 | -556.3881 | -612.9076 | -554.2351 | -593.4954 |
| 135       | -517.0687 | -556.3766 | -595.6623 | 479.0174  | -518.3034 | -556.3890 | -612.9082 | -554.2304 | -593.4910 |
| 150       | -517.0806 | -556.3880 | -595.6652 | -479.0237 | -518.3063 | -556.3914 | -612.9097 | -554.2239 | -593.4847 |
| 165       | -517.0804 | -556.3892 | -595.6668 | -479.0243 | -518.3083 | -556.3931 | -612.9109 | -554.2159 | -593.4771 |
| 180       | -517.0797 | -556.3893 | -595.6664 | -479.0242 | -518.3096 | -556.3945 | -612.9110 | -554.2076 | -593.4690 |

**Table S8** The potential energy of lowest singlet excited state ( $S_0$ ) of **SBLs** (except for **QL-CHO** due to the difficult for rotation of the EDG) along with the different dihedral angles ( $\varphi$ ) between benzene ring and the EDG, unit: Hartree

| $\varphi$ | Aze-CHO   | Pyr-CHO   | Pip-CHO   | N-CHO     | N-CO      | N-YT      | N-CONMe   | N-COOH    | N-COOMe   |
|-----------|-----------|-----------|-----------|-----------|-----------|-----------|-----------|-----------|-----------|
| 0         | -517.1991 | -556.5087 | -595.7840 | -479.1433 | -518.4265 | -556.5154 | -612.9816 | -554.3651 | -593.6214 |
| 15        | -517.1991 | -556.5076 | -595.7835 | -479.1429 | -518.4245 | -556.5150 | -612.9840 | -554.3598 | -593.6020 |
| 30        | -517.1990 | -556.5050 | -595.7842 | -479.1417 | -518.4235 | -556.5141 | -612.9831 | -554.3583 | -593.5839 |
| 45        | -517.1973 | -556.5019 | -595.7844 | -479.1404 | -518.4223 | -556.5129 | -612.9813 | -554.3220 | -593.5843 |
| 60        | -517.1941 | -556.4992 | -595.7833 | -479.1386 | -518.4206 | -556.5113 | -612.9796 | -554.3284 | -593.5907 |
| 75        | -517.1899 | -556.4959 | -595.7807 | -479.1357 | -518.4178 | -556.5085 | -612.9768 | -554.3352 | -593.5977 |
| 90        | -517.1859 | -556.4925 | -595.7777 | -479.1326 | -518.4149 | -556.5055 | -612.9735 | -554.3377 | -593.6002 |
| 105       | -517.1833 | -556.4905 | -595.7758 | -479.1306 | -518.4130 | -556.5036 | -612.9714 | -554.3358 | -593.5979 |
| 120       | -517.1823 | -556.4901 | -595.7755 | -479.1303 | -518.4127 | -556.5033 | -612.9710 | -554.3309 | -593.5929 |
| 135       | -517.1826 | -556.4913 | -595.7774 | -479.1322 | -518.4145 | -556.5050 | -612.9728 | -554.3262 | -593.5883 |
| 150       | -517.1989 | -556.5066 | -595.7816 | -479.1416 | -518.4189 | -556.5094 | -612.9770 | -554.3214 | -593.5836 |
| 165       | -517.1992 | -556.5084 | -595.7840 | -479.1429 | -518.4218 | -556.5122 | -612.9804 | -554.3184 | -593.5806 |
| 180       | -517.1991 | -556.5087 | -595.7841 | -479.1433 | -518.4248 | -556.5155 | -612.9804 | -554.3178 | -593.5802 |

The energy barrier ( $E_{EB}$ ) with rotation of the EDG was calculated according to the following formula:

$$E_{EB} = (E_{PE} - E_{PE0}) \times 27.21$$

where  $E_{PE}$  is the potential energy of  $S_1$  or  $S_0$  with different  $\varphi$  and  $E_{PE0}$  is the potential energy of  $S_1$  or  $S_0$  with  $\varphi = 0$ .

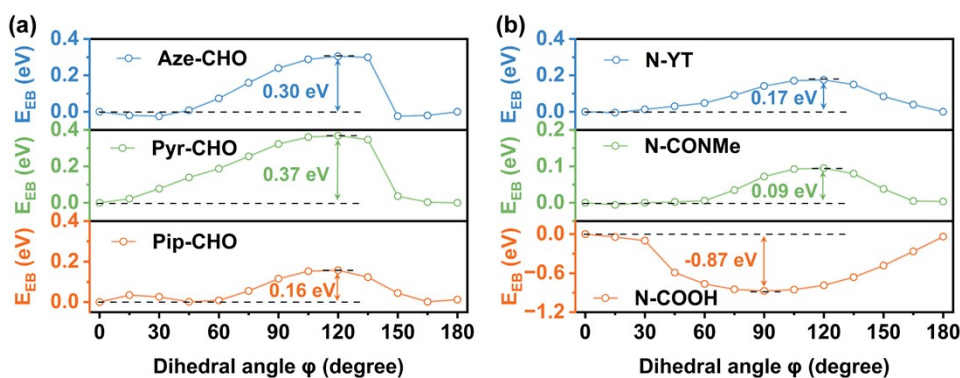

**Fig. S25** (a) The  $E_{EB}$  of the  $S_1$  for **Aze-CHO** (top), **Pyr-CHO** (middle), and **Pip-CHO** (bottom) with different  $\varphi$  between benzene ring and the EDG. (b) The  $E_{EB}$  of the  $S_1$  for **N-YT** (top), **N-CONMe** (middle), and **N-COOH** (bottom) with different  $\varphi$  between benzene ring and the EDG.

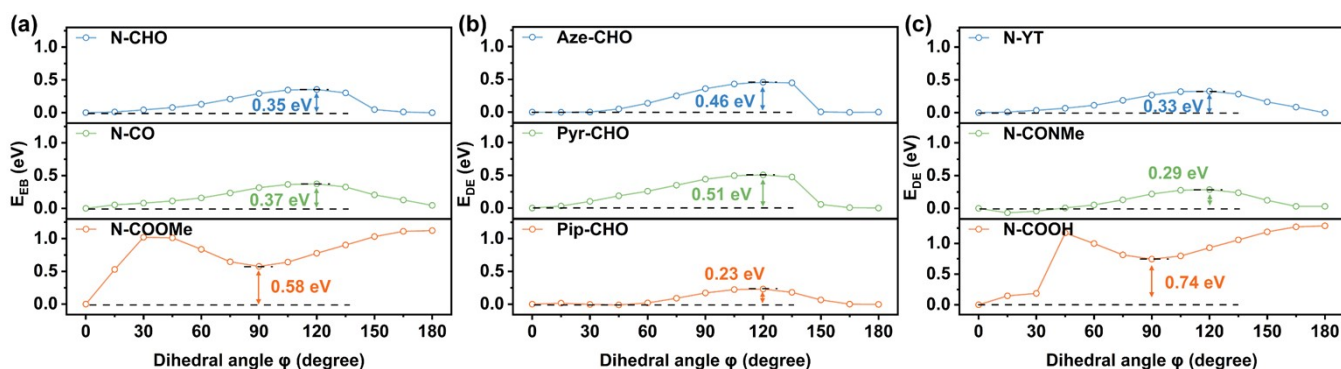

**Fig. S26** (a) The  $E_{EB}$  of the  $S_0$  for **N-CHO** (top), **N-CO** (middle), and **N-COOMe** (bottom) with different  $\phi$  between benzene ring and the EDG. (b) The  $E_{EB}$  of the  $S_0$  for **Aze-CHO** (top), **Pyr-CHO** (middle), and **Pip-CHO** (bottom) with different  $\phi$  between benzene ring and the EDG. (c) The  $E_{EB}$  of the  $S_0$  for **N-YT** (top), **N-CONMe** (middle), and **N-COOH** (bottom) with different  $\phi$  between benzene ring and the EDG.

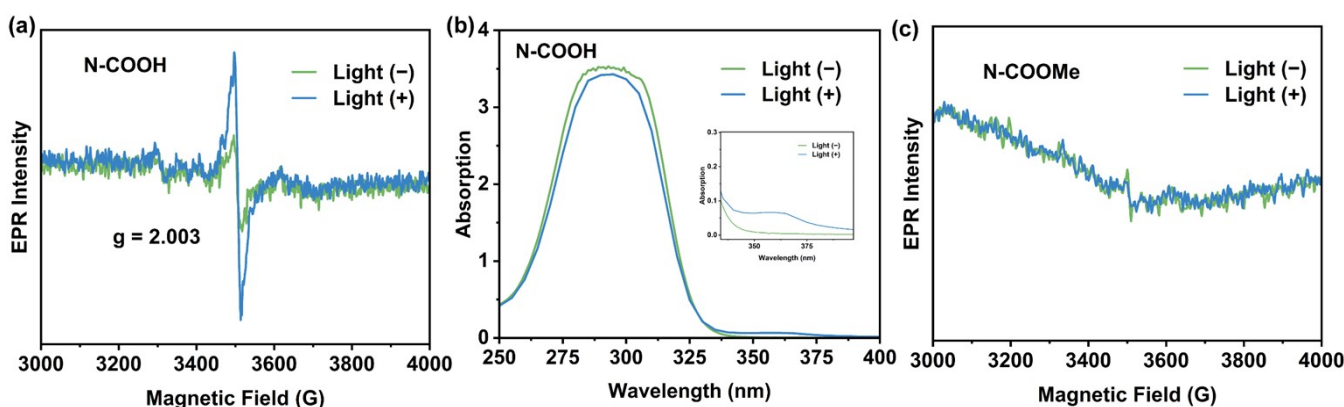

**Fig. S27** (a) The EPR spectra before and after irradiation of Xe lamp and (b) the absorption spectra before and after irradiation of 254 nm UV lamp for **N-COOH** doped film with the doped concentration of 1 wt%. (c) The EPR spectra before and after irradiation of Xe lamp for **N-COOMe** doped film with the doped concentration of 1 wt%.

**Table S9** The Hammett  $\sigma^-$  constant of EWGs<sup>11</sup>, dipole moment and LUMO energy of  $S_0$ .

|                | Hammett $\sigma^-$ constant of EWG | Dipole moment [Debye] | LUMO [eV] |
|----------------|------------------------------------|-----------------------|-----------|
| <b>N-CHO</b>   | 1.126                              | 6.54                  | -1.20     |
| <b>N-CO</b>    | 0.874                              | 5.76                  | -1.01     |
| <b>N-COOMe</b> | 0.636                              | 4.44                  | -0.71     |

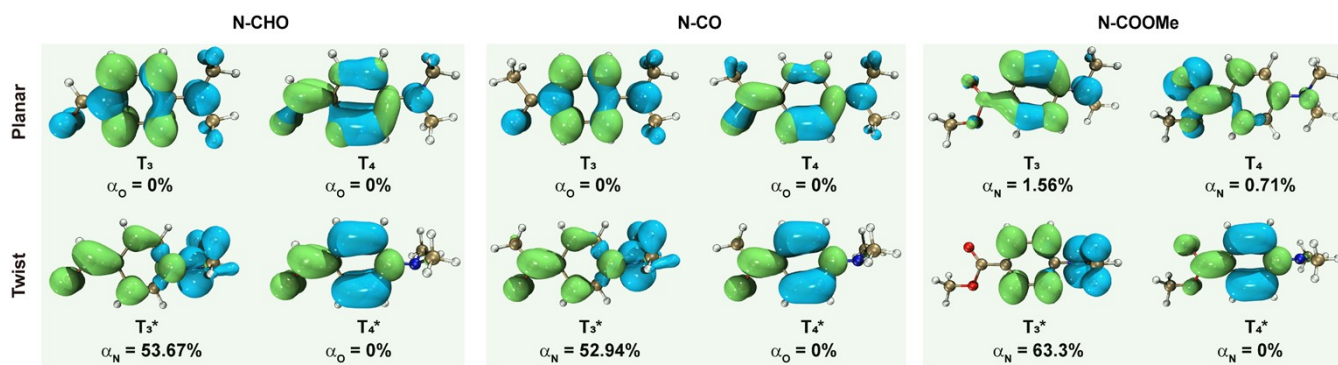

**Fig. S28** The hole-electron analysis of N-CHO (left), N-CO (middle), and N-COOMe (right) for their  $T_3$ , and  $T_4$  excited states in planar geometries, as well as the  $T_3^*$ , and  $T_4^*$  excited states in twisted geometries, with the corresponding proportions of n orbitals ( $\alpha$ ).

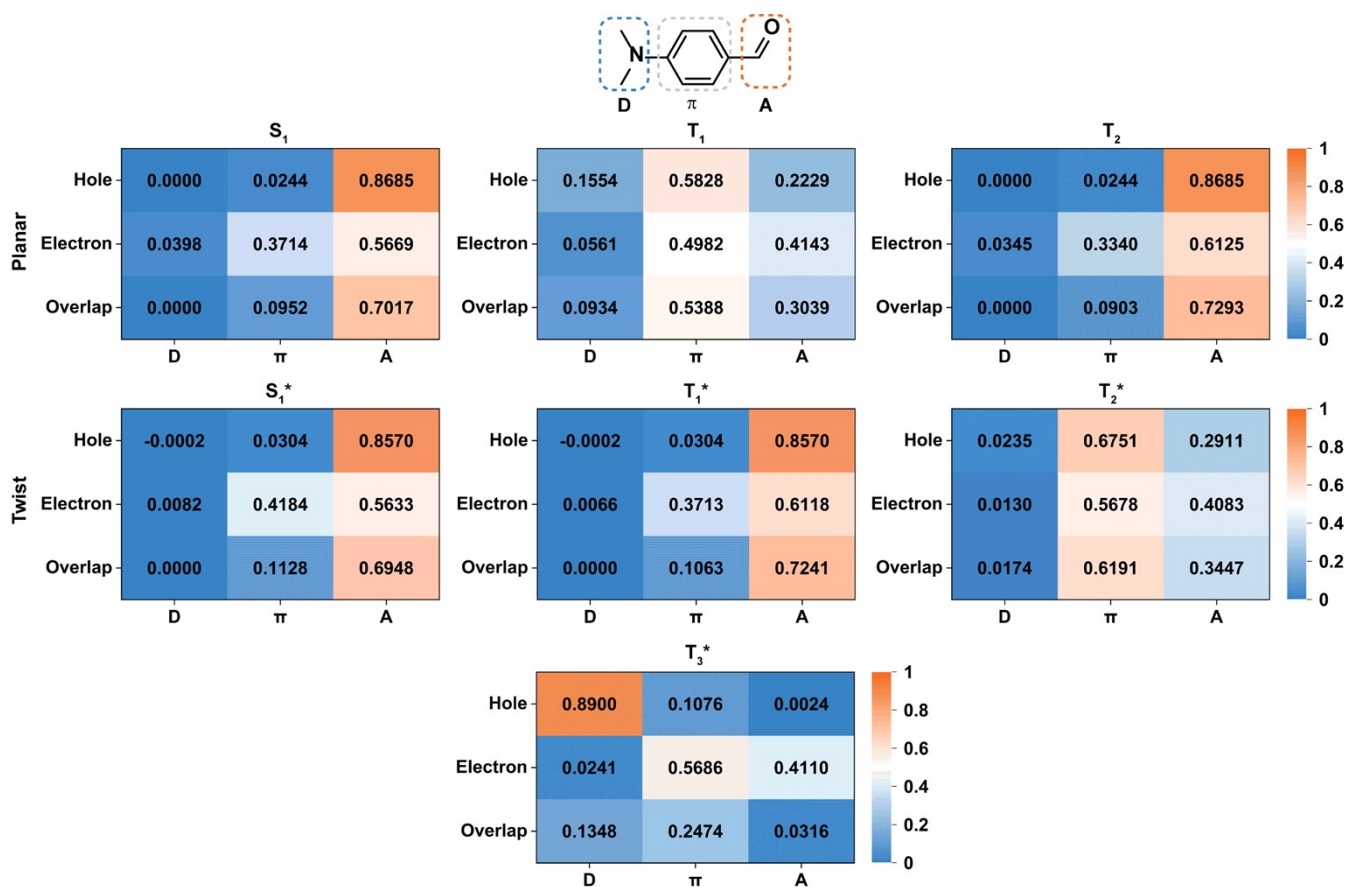

**Fig. S29** The heat map of electron and hole contributions from different fragments (D,  $\pi$ , and A) of different excited states in the planar and twisted geometries of N-CHO.

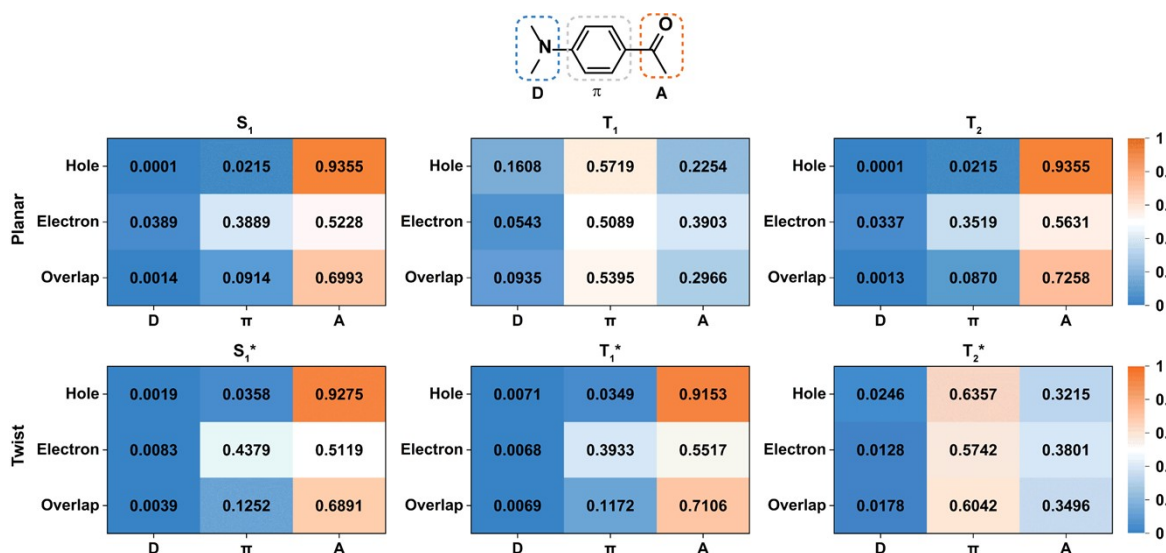

**Fig. S30** The heat map of electron and hole contributions from different fragments (D,  $\pi$ , and A) of different excited states in the planar and twisted geometries of N-CO.

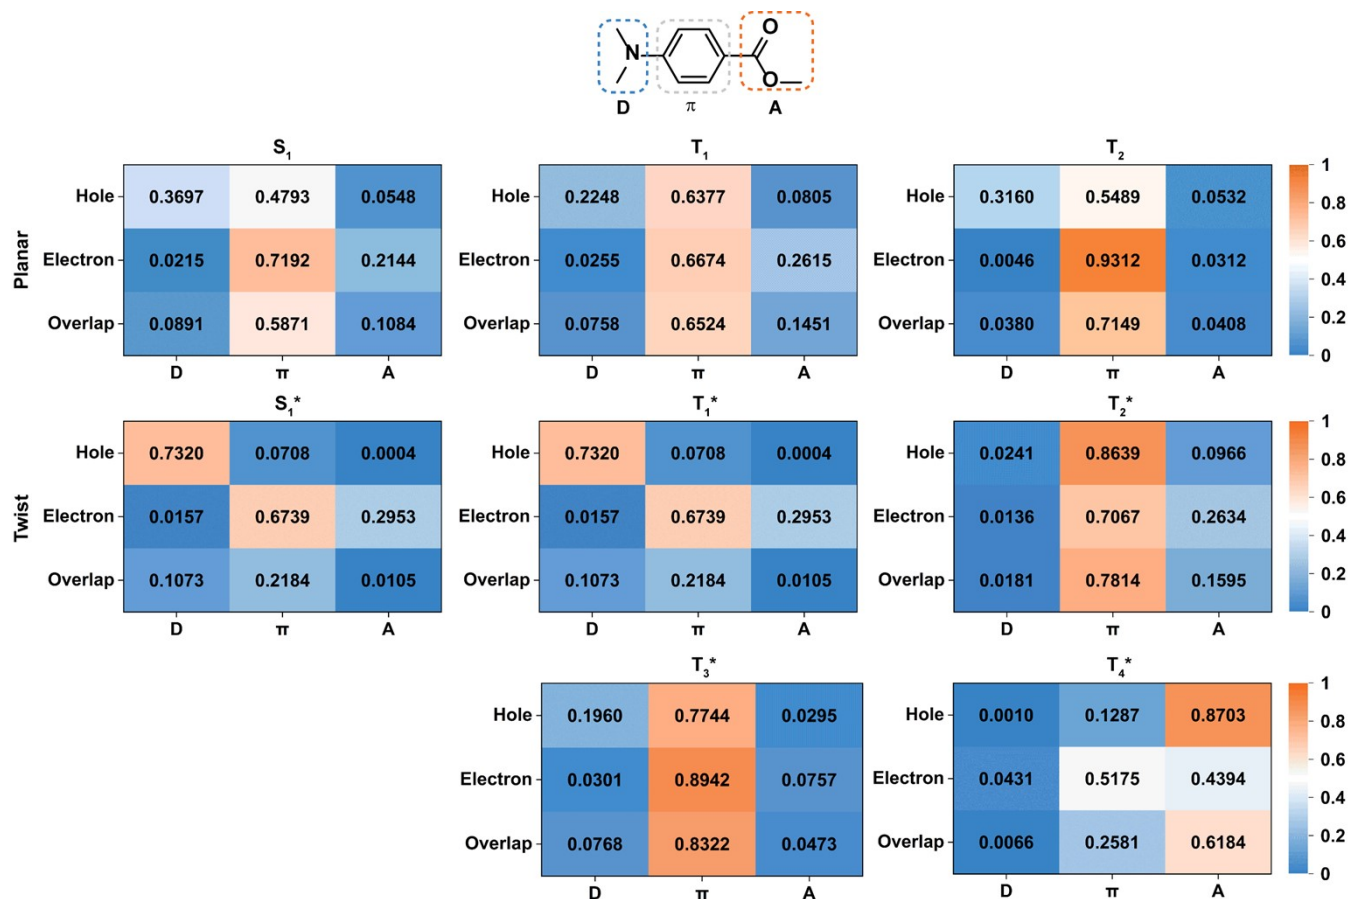

**Fig. S31** The heat map of electron and hole contributions from different fragments (D,  $\pi$ , and A) of different excited states in the planar and twisted geometries of N-COOMe.

**Table S10** The singlet and triplet excited state transition configurations of **N-CHO** revealed by TD-DFT calculations.

|         | n-th | Energy [eV] | Wavelength [nm] | f      | Transition configuration                                                          |
|---------|------|-------------|-----------------|--------|-----------------------------------------------------------------------------------|
| $S_n$   | 1    | 3.2399      | 382.68          | 0.0001 | H-1 $\rightarrow$ L 96.0%                                                         |
|         | 2    | 4.1756      | 296.92          | 0.5726 | H $\rightarrow$ L 95.9%                                                           |
| $T_n$   | 1    | 2.4354      | 509.09          | --     | H $\rightarrow$ L 91.7%, H-3 $\rightarrow$ L 6.8%                                 |
|         | 2    | 2.6695      | 464.45          | --     | H-1 $\rightarrow$ L 93.1%, H-1 $\rightarrow$ L+3 6.7%                             |
|         | 3    | 3.9551      | 313.48          | --     | H $\rightarrow$ L+1 92.8%                                                         |
|         | 4    | 4.1067      | 301.91          | --     | H-2 $\rightarrow$ L 35.5%, H-2 $\rightarrow$ L+1 31.6%, H-3 $\rightarrow$ L 18.9% |
| $S_n^*$ | 1    | 3.1090      | 398.79          | 0.0001 | H-1 $\rightarrow$ L 95.7%                                                         |
|         | 2    | 3.4353      | 360.92          | 0.0056 | H $\rightarrow$ L 97.4%                                                           |
| $T_n^*$ | 1    | 2.5143      | 493.12          | --     | H-1 $\rightarrow$ L 92.9%, H-1 $\rightarrow$ L+2 6.8%                             |
|         | 2    | 2.6247      | 472.37          | --     | H-2 $\rightarrow$ L 87.2%, H-3 $\rightarrow$ L+1 6.0%                             |
|         | 3    | 3.3918      | 365.54          | --     | H $\rightarrow$ L 93.1%                                                           |
|         | 4    | 3.8212      | 324.46          | --     | H-3 $\rightarrow$ L 96.1%                                                         |

**Table S11** The singlet and triplet excited state transition configurations of **N-CO** revealed by TD-DFT calculations.

|         | n-th | Energy [eV] | Wavelength [nm] | f      | Transition configuration                                                                                  |
|---------|------|-------------|-----------------|--------|-----------------------------------------------------------------------------------------------------------|
| $S_n$   | 1    | 3.1904      | 388.61          | 0.0001 | H-1 $\rightarrow$ L 96.1%                                                                                 |
|         | 2    | 4.1793      | 296.66          | 0.5903 | H $\rightarrow$ L 97.1%                                                                                   |
| $T_n$   | 1    | 2.4968      | 496.57          | --     | H $\rightarrow$ L 91.1%, H-3 $\rightarrow$ L 7.1%                                                         |
|         | 2    | 2.6539      | 467.17          | --     | H-1 $\rightarrow$ L 93.2%, H-1 $\rightarrow$ L+4 6.4%                                                     |
|         | 3    | 3.9493      | 313.94          | --     | H $\rightarrow$ L+1 95.5%                                                                                 |
|         | 4    | 4.1324      | 300.03          | --     | H-3 $\rightarrow$ L 30.4%, H-2 $\rightarrow$ L 26.4%, H-2 $\rightarrow$ L+1 26.3%, H $\rightarrow$ L 7.0% |
| $S_n^*$ | 1    | 3.0089      | 412.05          | 0.0000 | H-1 $\rightarrow$ L 93.9%                                                                                 |
|         | 2    | 3.5027      | 353.97          | 0.0067 | H $\rightarrow$ L 95.5%                                                                                   |
| $T_n^*$ | 1    | 2.4647      | 503.04          | --     | H-1 $\rightarrow$ L 92.1%, H-1 $\rightarrow$ L+2 5.9%                                                     |
|         | 2    | 2.6416      | 469.35          | --     | H-2 $\rightarrow$ L 86.2%, H-3 $\rightarrow$ L+1 5.8%                                                     |
|         | 3    | 3.4573      | 358.62          | --     | H $\rightarrow$ L 91.7%                                                                                   |
|         | 4    | 3.8563      | 321.51          | --     | H-3 $\rightarrow$ L 95.8%                                                                                 |

**Table S12** The singlet and triplet excited state transition configurations of **N-COOMe** revealed by TD-DFT calculations.

|                       | <b>n-th</b> | <b>Energy [eV]</b> | <b>Wavelength [nm]</b> | <b>f</b> | <b>Transition configuration</b>            |
|-----------------------|-------------|--------------------|------------------------|----------|--------------------------------------------|
| <b>S<sub>n</sub></b>  | 1           | 4.1089             | 301.75                 | 0.3636   | H → L 91.2%, H → L+1 6.2%                  |
|                       | 2           | 4.5719             | 271.19                 | 0.1096   | H → L+1 75.6%, H-1 → L 16.8%, H → L 6.2%   |
| <b>T<sub>n</sub></b>  | 1           | 2.7250             | 454.99                 | --       | H → L 89.0%                                |
|                       | 2           | 3.8384             | 323.01                 | --       | H → L+1 88.5%, H-1 → L+1 5.2%              |
|                       | 3           | 4.1725             | 297.15                 | --       | H-3 → L 55.0%, H-4 → L 22.3%, H → L+3 5.5% |
|                       | 4           | 4.4687             | 277.45                 | --       | H-4 → L 53.0%, H-3 → L 27.8%               |
| <b>S<sub>n</sub>*</b> | 1           | 2.7719             | 447.29                 | 0.0000   | H → L 98.2%                                |
|                       | 2           | 4.0793             | 303.94                 | 0.0001   | H → L+1 99.8%                              |
| <b>T<sub>n</sub>*</b> | 1           | 2.7405             | 452.41                 | --       | H → L 98.0%                                |
|                       | 2           | 3.0328             | 408.81                 | --       | H-1 → L 88.3%, H-2 → L+1 10.5%             |
|                       | 3           | 4.1725             | 297.15                 | --       | H → L+1 99.6%                              |
|                       | 4           | 4.4687             | 277.45                 | --       | H-2 → L 95.9%                              |

**Table S13** Calculated configuration proportion  $\alpha_n$  of different excited state in planar geometries for **N-CHO** based on MPA.

|                     | Basic Type | Atom | Composition | $\alpha_n$                                    |
|---------------------|------------|------|-------------|-----------------------------------------------|
| S <sub>1</sub> /H-1 | X          | 8(O) | 15.52425 %  | $\alpha_O = 77.11\% \times 96.0\% = 74.02\%$  |
|                     | Y          | 8(O) | 16.87032 %  |                                               |
|                     | X          | 8(O) | 14.78178 %  |                                               |
|                     | Y          | 8(O) | 15.42795 %  |                                               |
|                     | X          | 8(O) | 7.54930 %   |                                               |
|                     | Y          | 8(O) | 6.95538 %   |                                               |
| T <sub>1</sub> /H   | Z          | 8(O) | 4.87821 %   | $\alpha_O = 0\%$                              |
|                     | Z          | 8(O) | 4.54047 %   |                                               |
|                     | Z          | 8(O) | 2.27276 %   |                                               |
|                     | Z          | 9(N) | 12.49944 %  |                                               |
|                     | Z          | 9(N) | 11.40039 %  |                                               |
|                     | Z          | 9(N) | 3.05143 %   |                                               |
|                     | Z          | 8(O) | 8.35617 %   |                                               |
| T <sub>1</sub> /H-3 | Z          | 8(O) | 8.52552 %   | $\alpha_O = 0\%$                              |
|                     | Z          | 8(O) | 4.45358 %   |                                               |
|                     | Z          | 9(N) | 8.35117 %   |                                               |
|                     | Z          | 9(N) | 8.35879 %   |                                               |
|                     | Z          | 9(N) | 3.45744 %   |                                               |
|                     | Z          | 9(N) | 3.45744 %   |                                               |
| T <sub>2</sub> /H-1 | X          | 8(O) | 15.52425 %  | $\alpha_O = 77.11\% \times 99.80\% = 76.95\%$ |
|                     | Y          | 8(O) | 16.87032 %  |                                               |
|                     | X          | 8(O) | 14.78178 %  |                                               |
|                     | Y          | 8(O) | 15.42795 %  |                                               |
|                     | X          | 8(O) | 7.54930 %   |                                               |
|                     | Y          | 8(O) | 6.95538 %   |                                               |
| T <sub>3</sub> /H   | Z          | 8(O) | 4.87821 %   | $\alpha_O = 0\%$                              |
|                     | Z          | 8(O) | 4.54047 %   |                                               |
|                     | Z          | 8(O) | 2.27276 %   |                                               |
|                     | Z          | 9(N) | 12.49944 %  |                                               |
|                     | Z          | 9(N) | 11.40039 %  |                                               |
|                     | Z          | 9(N) | 3.05143 %   |                                               |
| T <sub>4</sub> /H-3 | Z          | 8(O) | 8.35617 %   | $\alpha_O = 0\%$                              |
|                     | Z          | 8(O) | 8.52552 %   |                                               |
|                     | Z          | 8(O) | 4.45358 %   |                                               |
|                     | Z          | 9(N) | 8.35117 %   |                                               |
|                     | Z          | 9(N) | 8.35879 %   |                                               |
|                     | Z          | 9(N) | 3.45744 %   |                                               |
| T <sub>4</sub> /H-2 | --         | --   | --          |                                               |

**Table S14** Calculated configuration proportion  $\alpha_n$  of different excited state in twisted geometries for N-CHO based on MPA.

|                       | Basic Type | Atom | Composition | $\alpha_n$                                   |
|-----------------------|------------|------|-------------|----------------------------------------------|
| S <sub>1</sub> */ H-1 | X          | 8(O) | 12.70425 %  | $\alpha_O = 75.30\% \times 95.7\% = 72.06\%$ |
|                       | Y          | 8(O) | 19.19671 %  |                                              |
|                       | X          | 8(O) | 12.10607 %  |                                              |
|                       | Y          | 8(O) | 17.49378 %  |                                              |
|                       | X          | 8(O) | 6.10696 %   |                                              |
|                       | Y          | 8(O) | 7.69304 %   |                                              |
| T <sub>1</sub> */ H-1 | X          | 8(O) | 12.70425 %  | $\alpha_O = 75.30\% \times 99.7\% = 75.07\%$ |
|                       | Y          | 8(O) | 19.19671 %  |                                              |
|                       | X          | 8(O) | 12.10607 %  |                                              |
|                       | Y          | 8(O) | 17.49378 %  |                                              |
|                       | X          | 8(O) | 6.10696 %   |                                              |
|                       | Y          | 8(O) | 7.69304 %   |                                              |
| T <sub>2</sub> */ H-2 | Z          | 8(O) | 7.45837 %   | $\alpha_O = 0\%$                             |
|                       | Z          | 8(O) | 7.19784 %   |                                              |
|                       | Z          | 8(O) | 3.49115 %   |                                              |
| T <sub>2</sub> */ H-3 | Z          | 8(O) | 0%          |                                              |
| T <sub>3</sub> */ H   | Y          | 9(N) | 23.88431 %  | $\alpha_N = 57.65\% \times 93.1\% = 53.67\%$ |
|                       | Z          | 9(N) | 0.75786 %   |                                              |
|                       | Y          | 9(N) | 22.90849 %  |                                              |
|                       | Z          | 9(N) | 0.71021 %   |                                              |
|                       | Y          | 9(N) | 10.85537 %  |                                              |
| T <sub>4</sub> */ H-3 | Z          | 8(O) | 0%          | $\alpha_O = 0\%$                             |

**Table S15** Calculated configuration proportion  $\alpha_n$  of different excited state in planar geometries for N-CO based on MPA.

|                      | Basic Type | Atom | Composition | $\alpha_n$                                   |
|----------------------|------------|------|-------------|----------------------------------------------|
| S <sub>1</sub> / H-1 | X          | 8(O) | 20.47299 %  | $\alpha_O = 76.87\% \times 96.1\% = 73.87\%$ |
|                      | Y          | 8(O) | 11.90359 %  |                                              |
|                      | X          | 8(O) | 19.25791 %  |                                              |
|                      | Y          | 8(O) | 10.73581 %  |                                              |
|                      | X          | 8(O) | 9.77214 %   |                                              |
|                      | Y          | 8(O) | 4.72283 %   |                                              |
| T <sub>1</sub> / H   | Z          | 8(O) | 4.55938 %   | $\alpha_O = 0\%$                             |
|                      | Z          | 8(O) | 4.26602 %   |                                              |
|                      | Z          | 8(O) | 2.19064 %   |                                              |
|                      | Z          | 9(N) | 12.56035 %  |                                              |
|                      | Z          | 9(N) | 11.45220 %  |                                              |
|                      | Z          | 9(N) | 3.07459 %   |                                              |
| T <sub>1</sub> / H-3 | Z          | 8(O) | 10.01865 %  | $\alpha_O = 0\%$                             |
|                      | Z          | 8(O) | 10.24444 %  |                                              |
|                      | Z          | 8(O) | 5.46069 %   |                                              |
|                      | Z          | 9(N) | 7.69123 %   |                                              |
|                      | Z          | 9(N) | 7.68877 %   |                                              |
|                      | Z          | 9(N) | 3.16527 %   |                                              |
| T <sub>2</sub> / H-1 | X          | 8(O) | 20.47299 %  | $\alpha_O = 76.87\% \times 99.8\% = 76.72\%$ |
|                      | Y          | 8(O) | 11.90359 %  |                                              |
|                      | X          | 8(O) | 19.25791 %  |                                              |
|                      | Y          | 8(O) | 10.73581 %  |                                              |
|                      | X          | 8(O) | 9.77214 %   |                                              |
|                      | Y          | 8(O) | 4.72283 %   |                                              |
| T <sub>3</sub> / H   | Z          | 8(O) | 4.55938 %   | $\alpha_O = 0\%$                             |
|                      | Z          | 8(O) | 4.26602 %   |                                              |
|                      | Z          | 8(O) | 2.19064 %   |                                              |
|                      | Z          | 9(N) | 12.56035 %  |                                              |
|                      | Z          | 9(N) | 11.45220 %  |                                              |
|                      | Z          | 9(N) | 3.07459 %   |                                              |
| T <sub>4</sub> / H   | Z          | 8(O) | 4.55938 %   | $\alpha_O = 0\%$                             |
|                      | Z          | 8(O) | 4.26602 %   |                                              |
|                      | Z          | 8(O) | 2.19064 %   |                                              |
|                      | Z          | 9(N) | 12.56035 %  |                                              |
|                      | Z          | 9(N) | 11.45220 %  |                                              |
|                      | Z          | 9(N) | 3.07459 %   |                                              |
| T <sub>4</sub> / H-2 | --         | --   | --          |                                              |
| T <sub>4</sub> / H-3 | Z          | 8(O) | 10.01865 %  |                                              |
|                      | Z          | 8(O) | 10.24444 %  |                                              |

|   |      |           |
|---|------|-----------|
| Z | 8(O) | 5.46069 % |
| Z | 9(N) | 7.69123 % |
| Z | 9(N) | 7.68877 % |
| Z | 9(N) | 3.16527 % |

**Table S16** Calculated configuration proportion  $\alpha_n$  of different excited state in twisted geometries for N-CO based on MPA.

|                       | Basic Type | Atom | Composition | $\alpha_n$                                    |
|-----------------------|------------|------|-------------|-----------------------------------------------|
| S <sub>1</sub> */ H-1 | X          | 8(O) | 18.60534 %  | $\alpha_O = 74.58\% \times 93.9\% = 70.04\%$  |
|                       | Y          | 8(O) | 12.82579 %  |                                               |
|                       | X          | 8(O) | 17.46883 %  |                                               |
|                       | Y          | 8(O) | 11.51121 %  |                                               |
|                       | X          | 8(O) | 9.04326 %   |                                               |
|                       | Y          | 8(O) | 5.13115 %   |                                               |
| T <sub>1</sub> */ H-1 | X          | 8(O) | 18.60534 %  | $\alpha_O = 74.58\% \times 98.00\% = 73.09\%$ |
|                       | Y          | 8(O) | 12.82579 %  |                                               |
|                       | X          | 8(O) | 17.46883 %  |                                               |
|                       | Y          | 8(O) | 11.51121 %  |                                               |
|                       | X          | 8(O) | 9.04326 %   |                                               |
|                       | Y          | 8(O) | 5.13115 %   |                                               |
| T <sub>2</sub> */ H-2 | Z          | 8(O) | 7.89519 %   | $\alpha_O = 0\%$                              |
|                       | Z          | 8(O) | 7.68163 %   |                                               |
|                       | Z          | 8(O) | 3.73457 %   |                                               |
| T <sub>2</sub> */ H-3 | Z          | 8(O) | 0%          |                                               |
| T <sub>3</sub> */ H   | X          | 9(N) | 0.86178 %   | $\alpha_N = 57.73\% \times 91.7\% = 52.94\%$  |
|                       | Y          | 9(N) | 23.25557 %  |                                               |
|                       | X          | 9(N) | 0.75969 %   |                                               |
|                       | Y          | 9(N) | 22.32265 %  |                                               |
|                       | Y          | 9(N) | 10.53145 %  |                                               |
| T <sub>4</sub> */ H-3 | Z          | 8(O) | 0%          | $\alpha_O = 0\%$                              |

**Table S17** Calculated configuration proportion  $\alpha_n$  of different excited state in planar geometries for N-COOMe based on MPA.

|                      | Basic Type | Atom  | Composition | $\alpha_n$                                                                           |
|----------------------|------------|-------|-------------|--------------------------------------------------------------------------------------|
| S <sub>1</sub> / H   | Z          | 8(O)  | 1.56405 %   | $\alpha_O = 0\%$<br>$\alpha_N = 3.10\% \times 97.4\% = 3.02\%$                       |
|                      | Z          | 8(O)  | 1.40485 %   |                                                                                      |
|                      | Z          | 8(O)  | 0.53749 %   |                                                                                      |
|                      | Y          | 9(N)  | 1.28549 %   |                                                                                      |
|                      | Z          | 9(N)  | 13.37345 %  |                                                                                      |
|                      | Y          | 9(N)  | 1.21164 %   |                                                                                      |
|                      | Z          | 9(N)  | 12.19201 %  |                                                                                      |
|                      | Y          | 9(N)  | 0.60766 %   |                                                                                      |
|                      | Z          | 9(N)  | 3.64612 %   |                                                                                      |
| T <sub>1</sub> / H   | Z          | 8(O)  | 1.56405 %   | $\alpha_O = 0\%$<br>$\alpha_N = 3.10\% \times 89.0\% = 2.76\%$                       |
|                      | Z          | 8(O)  | 1.40485 %   |                                                                                      |
|                      | Z          | 8(O)  | 0.53749 %   |                                                                                      |
|                      | Y          | 9(N)  | 1.28549 %   |                                                                                      |
|                      | Z          | 9(N)  | 13.37345 %  |                                                                                      |
|                      | Y          | 9(N)  | 1.21164 %   |                                                                                      |
|                      | Z          | 9(N)  | 12.19201 %  |                                                                                      |
|                      | Y          | 9(N)  | 0.60766 %   |                                                                                      |
|                      | Z          | 9(N)  | 3.64612 %   |                                                                                      |
| T <sub>2</sub> / H   | Z          | 8(O)  | 1.56405 %   | $\alpha_O = 0\%$<br>$\alpha_N = 3.10\% \times 88.5\% = 2.75\%$                       |
|                      | Z          | 8(O)  | 1.40485 %   |                                                                                      |
|                      | Z          | 8(O)  | 0.53749 %   |                                                                                      |
|                      | Y          | 9(N)  | 1.28549 %   |                                                                                      |
|                      | Z          | 9(N)  | 13.37345 %  |                                                                                      |
|                      | Y          | 9(N)  | 1.21164 %   |                                                                                      |
|                      | Z          | 9(N)  | 12.19201 %  |                                                                                      |
|                      | Y          | 9(N)  | 0.60766 %   |                                                                                      |
|                      | Z          | 9(N)  | 3.64612 %   |                                                                                      |
| T <sub>3</sub> / H-3 | Z          | 8(O)  | 3.07864 %   | $\alpha_O = 0\%$<br>$\alpha_N = 2.55\% \times 55.0\% + 3.10\% \times 5.0\% = 1.56\%$ |
|                      | Z          | 8(O)  | 2.99843 %   |                                                                                      |
|                      | Z          | 8(O)  | 1.30714 %   |                                                                                      |
|                      | Y          | 9(N)  | 1.33607 %   |                                                                                      |
|                      | Z          | 9(N)  | 6.53685 %   |                                                                                      |
|                      | Y          | 9(N)  | 1.21380 %   |                                                                                      |
|                      | Z          | 9(N)  | 6.76332 %   |                                                                                      |
|                      | Z          | 9(N)  | 3.35588 %   |                                                                                      |
|                      | Z          | 8(O)  | 10.40268 %  |                                                                                      |
| T <sub>3</sub> / H-4 | Z          | 8(O)  | 10.24390 %  |                                                                                      |
|                      | Z          | 8(O)  | 5.66254 %   |                                                                                      |
|                      | Z          | 12(O) | 20.94740 %  |                                                                                      |

|                      |   |       |            |  |
|----------------------|---|-------|------------|--|
|                      | Z | 12(O) | 19.19556 % |  |
|                      | Z | 12(O) | 7.44950 %  |  |
|                      | Z | 8(O)  | 1.56405 %  |  |
|                      | Z | 8(O)  | 1.40485 %  |  |
|                      | Z | 8(O)  | 0.53749 %  |  |
|                      | Y | 9(N)  | 1.28549 %  |  |
| T <sub>3</sub> / H   | Z | 9(N)  | 13.37345 % |  |
|                      | Y | 9(N)  | 1.21164 %  |  |
|                      | Z | 9(N)  | 12.19201 % |  |
|                      | Y | 9(N)  | 0.60766 %  |  |
|                      | Z | 9(N)  | 3.64612 %  |  |
|                      | Z | 8(O)  | 3.07864 %  |  |
|                      | Z | 8(O)  | 2.99843 %  |  |
|                      | Z | 8(O)  | 1.30714 %  |  |
| T <sub>4</sub> / H-3 | Y | 9(N)  | 1.33607 %  |  |
|                      | Z | 9(N)  | 6.53685 %  |  |
|                      | Y | 9(N)  | 1.21380 %  |  |
|                      | Z | 9(N)  | 6.76332 %  |  |
|                      | Z | 9(N)  | 3.35588 %  |  |
|                      | Z | 8(O)  | 10.40268 % |  |
|                      | Z | 8(O)  | 10.24390 % |  |
|                      | Z | 8(O)  | 5.66254 %  |  |
| T <sub>4</sub> / H-4 | Z | 12(O) | 20.94740 % |  |
|                      | Z | 12(O) | 19.19556 % |  |
|                      | Z | 12(O) | 7.44950 %  |  |

$$\alpha_O = 0\%$$

$$\alpha_N = 2.55\% \times 27.8\% = 0.71\%$$

**Table S18** Calculated configuration proportion  $\alpha_n$  of different excited state in twisted geometries for **N-COOMe** based on MPA.

|             | Basic Type | Atom  | Composition | $\alpha_n$                                   |
|-------------|------------|-------|-------------|----------------------------------------------|
| $S_1^*/H$   | Y          | 9(N)  | 27.01823 %  | $\alpha_N = 63.55\% \times 98.2\% = 62.41\%$ |
|             | Y          | 9(N)  | 25.22026 %  |                                              |
|             | Y          | 9(N)  | 11.31411 %  |                                              |
| $T_1^*/H$   | Y          | 9(N)  | 27.01823 %  | $\alpha_N = 63.55\% \times 98.0\% = 62.28\%$ |
|             | Y          | 9(N)  | 25.22026 %  |                                              |
|             | Y          | 9(N)  | 11.31411 %  |                                              |
| $T_2^*/H-1$ | Z          | 8(O)  | 3.16681 %   | $\alpha_O = 0\%$                             |
|             | Z          | 8(O)  | 2.98432 %   |                                              |
|             | Z          | 8(O)  | 1.20665 %   |                                              |
|             | Z          | 12(O) | 0.88727 %   |                                              |
|             | Z          | 12(O) | 0.76838 %   |                                              |
| $T_3^*/H$   | Y          | 9(N)  | 27.01823 %  | $\alpha_N = 63.55\% \times 99.6\% = 63.3\%$  |
|             | Y          | 9(N)  | 25.22026 %  |                                              |
|             | Y          | 9(N)  | 11.31411 %  |                                              |
| $T_4^*/H-2$ | --         | --    | --          | $\alpha_N = 0\%$                             |

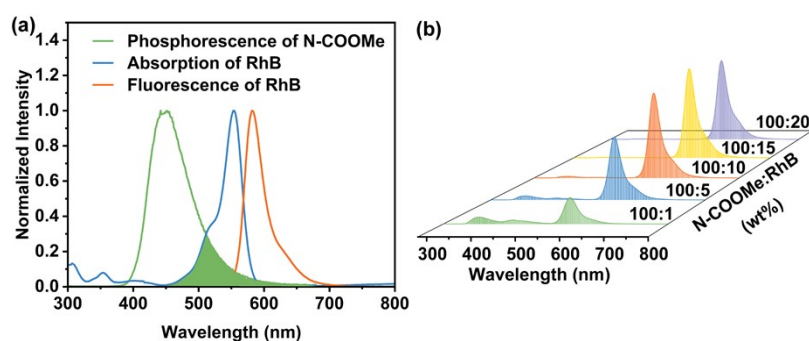

**Fig. S32** (a) The normalized phosphorescence spectra of **N-COOMe** doped PVA film, as well as the normalized absorption and fluorescence spectra of **RhB** aqueous solution,  $C = 5 \times 10^{-5}$  mol/L. (b) The fluorescence spectra of the hybrid film with different ratio of donor and acceptor.

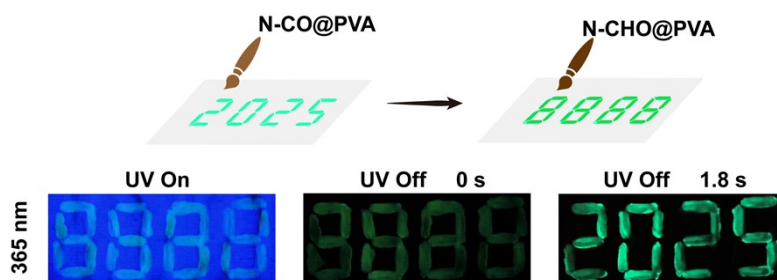

**Fig. S33** Processes of encrypted information writing by using **N-CO@PVA** and **N-CHO@PVA**, as well as photographs of time-dependent information security encryption.

#### 4. Reference

1. Z. Yin, M. Gu, H. Ma, X. Jiang, J. Zhi, Y. Wang, H. Yang, W. Zhu and Z. An, *Angew. Chem. Int. Ed.*, 2021, 60, 2058-2063.
2. W. Humphrey, A. Dalke and K. Schulten, *J. Mol. Graph.*, 1996, 14, 33-38.
3. T. Lu and F. Chen, *J. Comput. Chem.*, 2012, 33, 580-592.
4. Z. Liu, T. Lu and Q. Chen, *Carbon*, 2020, 165, 461-467.
5. W. J. Zhao, Z. K. He, J. W. Y. Lam, Q. Peng, H. L. Ma, Z. G. Shuai, G. X. Bai, J. H. Hao and B. Z. Tang, *Chem*, 2016, 1, 592-602.
6. H. Ma, Q. Peng, Z. An, W. Huang and Z. Shuai, *J. Am. Chem. Soc.*, 2018, 141, 1010-1015.
7. F. Neese, F. Wennmohs, U. Becker and C. Riplinger, *J. Chem. Phys.*, 2020, 152, 224108.
8. F. Neese, *WIREs Comput. Mol. Sci.* , 2018, 8, e1327.
9. F. Neese, *WIREs Comput. Mol. Sci.* , 2012, 2, 73-78.
10. D. Cui, L. Zhang, J. Zhang, W. Li, J. Chen, Z. Guo, C. Sun, Y. Wang, W. Wang, S. Li, W. Huang, C. Zheng and R. Chen, *Angew. Chem. Int. Ed.*, 2024, 63, e202411588.
11. J. E. Leffler and E. Grunwald, *Rates and Equilibria of Organic Reactions*, Wiley, New York, 1963.
